# Supplementary material for: A comprehensive test set of epoxidation rate constants for iron(iv)–oxo porphyrin cation radical complexes
Source: PubMed Central journal article supplement (PMC5811088; doi:10.1039/c4sc02717e), 2014-12-08
Supplement: SC-006-C4SC02717E-s001.pdf [file SC-006-C4SC02717E-s001.pdf]

# Electronic Supporting Information

## A comprehensive test set of epoxidation rate constants by iron(IV)-oxo porphyrin complexes

Mala A. Sainna,<sup>a</sup> Suresh Kumar,<sup>b</sup> Devesh Kumar,<sup>\*b</sup> Simonetta Fornarini,<sup>\*c</sup> Maria Elisa Crestoni<sup>\*c</sup> and Sam P. de Visser<sup>\*a</sup>

<sup>a</sup> Manchester Institute of Biotechnology and School of Chemical Engineering and Analytical Science, The University of Manchester, 131 Princess Street, Manchester M1 7DN, United Kingdom. E-mail: [sam.devisser@manchester.ac.uk](mailto:sam.devisser@manchester.ac.uk)

<sup>b</sup> Department of Applied Physics, School for Physical Sciences, Babasaheb Bhimrao Ambedkar University, Vidya Vihar, Rai Bareilly Road, Lucknow 226 025, India. E-mail: [dkclcre@yahoo.com](mailto:dkclcre@yahoo.com)

<sup>c</sup> Dipartimento di Chimica e Tecnologie del Farmaco, Università di Roma "La Sapienza", P.le A. Moro 5, 00185, Roma, Italy, E-mail: [mariaelisa.crestoni@uniroma1.it](mailto:mariaelisa.crestoni@uniroma1.it) / [simonetta.fornarini@uniroma1.it](mailto:simonetta.fornarini@uniroma1.it)

**Table S1: Absolute energies, zero-point energies and free energies (in au) of optimized geometries of different electronic states of [Fe<sup>IV</sup>(O)(Por<sup>•+</sup>)]<sup>+</sup> at UB3LYP/BS1 in Jaguar.**

|                              |                                                                                           | E, au       | ZPE, au | G, au       | E, au       |
|------------------------------|-------------------------------------------------------------------------------------------|-------------|---------|-------------|-------------|
|                              |                                                                                           | [BS1]       | [BS1]   | [BS1]       | [BS2]       |
| <sup>4</sup> Δ <sub>xy</sub> | δ <sup>↑</sup> π* <sub>xz</sub> ↑ π* <sub>yz</sub> ↑ σ* <sub>xy</sub> ↑ a <sub>1u</sub> ↓ | -1186.51601 | 0.27703 | -1186.28601 | -1187.04719 |
| <sup>2</sup> A <sub>1u</sub> | δ <sup>2</sup> π* <sub>xz</sub> ↑ π* <sub>yz</sub> ↑ a <sub>1u</sub> ↓                    | -1186.53700 | 0.27858 | -1186.30589 | -1187.06418 |
| <sup>4</sup> A <sub>1u</sub> | δ <sup>2</sup> π* <sub>xz</sub> ↑ π* <sub>yz</sub> ↑ a <sub>1u</sub> ↑                    | -1186.53657 | 0.27834 | -1186.30479 | -1187.06282 |
| <sup>2</sup> A <sub>2u</sub> | δ <sup>2</sup> π* <sub>xz</sub> ↑ π* <sub>yz</sub> ↑ a <sub>2u</sub> ↓                    | -1186.53360 | 0.27862 | -1186.30109 | -1187.06160 |
| <sup>4</sup> A <sub>2u</sub> | δ <sup>2</sup> π* <sub>xz</sub> ↑ π* <sub>yz</sub> ↑ a <sub>2u</sub> ↑                    | -1186.53428 | 0.27864 | -1186.30238 | -1187.06224 |
| <sup>6</sup> A <sub>2u</sub> | δ <sup>↑</sup> π* <sub>xz</sub> ↑ π* <sub>yz</sub> ↑ σ* <sub>xy</sub> ↑ a <sub>2u</sub> ↑ | -1186.51494 | 0.27647 | -1186.28603 | -1187.04733 |
| <sup>4</sup> Δ <sub>zz</sub> | δ <sup>↑</sup> π* <sub>xz</sub> ↑ π* <sub>yz</sub> ↑ σ* <sub>zz</sub> ↑ a <sub>2u</sub> ↓ | -1186.50682 | 0.28014 | -1186.27230 | -1187.03461 |

**Table S2: Relative energies and free energies (in kcal mol<sup>-1</sup>) of optimized geometries of different electronic states of [Fe<sup>IV</sup>(O)(Por<sup>•+</sup>)]<sup>+</sup> at UB3LYP/BS1 in Jaguar.**

|                              | ΔE    | ΔE+ZPE | ΔE    | ΔE+ZPE | ΔG    | ΔG    |
|------------------------------|-------|--------|-------|--------|-------|-------|
|                              | [BS1] | [BS1]  | [BS2] | [BS2]  | [BS1] | [BS2] |
| <sup>4</sup> Δ <sub>xy</sub> | 13.17 | 12.20  | 10.66 | 9.69   | 12.47 | 9.96  |
| <sup>2</sup> A <sub>1u</sub> | 0.00  | 0.00   | 0.00  | 0.00   | 0.00  | 0.00  |
| <sup>4</sup> A <sub>1u</sub> | 0.27  | 0.12   | 0.86  | 0.71   | 0.69  | 1.28  |
| <sup>2</sup> A <sub>2u</sub> | 2.14  | 2.16   | 1.62  | 1.65   | 3.02  | 2.50  |
| <sup>4</sup> A <sub>2u</sub> | 1.70  | 1.74   | 1.22  | 1.25   | 2.21  | 1.72  |
| <sup>6</sup> A <sub>2u</sub> | 13.84 | 12.52  | 10.58 | 9.25   | 12.47 | 9.20  |
| <sup>4</sup> Δ <sub>zz</sub> | 18.94 | 19.92  | 18.55 | 19.53  | 21.08 | 20.69 |

**Table S3: Absolute energies (in au) and relative energies (in kcal mol<sup>-1</sup>) of optimized geometries of different electronic states of [Fe<sup>IV</sup>(O)(Por<sup>•+</sup>)]<sup>+</sup> at UB3LYP/BS2 in Jaguar.**

|                              |                                                                                           | E, au       | ΔE    |
|------------------------------|-------------------------------------------------------------------------------------------|-------------|-------|
|                              |                                                                                           | [BS2]       | [BS2] |
| <sup>2</sup> A <sub>2u</sub> | δ <sup>2</sup> π* <sub>xz</sub> ↑ π* <sub>yz</sub> ↑ a <sub>2u</sub> ↓                    | -1187.06414 | 3.72  |
| <sup>4</sup> A <sub>2u</sub> | δ <sup>2</sup> π* <sub>xz</sub> ↑ π* <sub>yz</sub> ↑ a <sub>2u</sub> ↑                    | -1187.06468 | 3.38  |
| <sup>6</sup> A <sub>2u</sub> | δ <sup>↑</sup> π* <sub>xz</sub> ↑ π* <sub>yz</sub> ↑ σ* <sub>xy</sub> ↑ a <sub>2u</sub> ↑ | -1187.03820 | 20.00 |
| <sup>2</sup> A <sub>1u</sub> | δ <sup>2</sup> π* <sub>xz</sub> ↑ π* <sub>yz</sub> ↑ a <sub>1u</sub> ↓                    | -1187.07007 | 0.00  |
| <sup>4</sup> A <sub>1u</sub> | δ <sup>2</sup> π* <sub>xz</sub> ↑ π* <sub>yz</sub> ↑ a <sub>1u</sub> ↑                    | -1187.06952 | 0.34  |

**Table S4: Absolute energies (in au) and relative energies (in kcal mol<sup>-1</sup>) of optimized geometries of different electronic states of [Fe<sup>IV</sup>(O)(Por<sup>+</sup>)]<sup>+</sup> at UB3LYP-D3/BS2 in Jaguar.**

|                              |                                                                                | E, au        | ΔE    |
|------------------------------|--------------------------------------------------------------------------------|--------------|-------|
|                              |                                                                                | [BS2]        | [BS2] |
| <sup>2</sup> A <sub>2u</sub> | δ <sup>2</sup> π* <sub>xz</sub> ↑ π* <sub>yz</sub> ↑ a <sub>2u</sub> ↓         | -1187.110789 | 3.78  |
| <sup>4</sup> A <sub>2u</sub> | δ <sup>2</sup> π* <sub>xz</sub> ↑ π* <sub>yz</sub> ↑ a <sub>2u</sub> ↑         | -1187.111331 | 3.44  |
| <sup>6</sup> A <sub>2u</sub> | δ ↑ π* <sub>xz</sub> ↑ π* <sub>yz</sub> ↑ σ* <sub>xy</sub> ↑ a <sub>2u</sub> ↑ | -1187.083809 | 20.71 |
| <sup>2</sup> A <sub>1u</sub> | δ <sup>2</sup> π* <sub>xz</sub> ↑ π* <sub>yz</sub> ↑ a <sub>1u</sub> ↓         | -1187.116807 | 0.00  |
| <sup>4</sup> A <sub>1u</sub> | δ <sup>2</sup> π* <sub>xz</sub> ↑ π* <sub>yz</sub> ↑ a <sub>1u</sub> ↑         | -1187.116237 | 0.36  |

**Table S5: Group spin densities and charges of optimized geometries of different electronic states of [Fe<sup>IV</sup>(O)(Por<sup>+</sup>)]<sup>+</sup> at UB3LYP/BS1 in Jaguar.**

|                              |                                                                                | Spin Densities |      |       | Charges |       |      |
|------------------------------|--------------------------------------------------------------------------------|----------------|------|-------|---------|-------|------|
|                              |                                                                                | Fe             | O    | Por   | Fe      | O     | Por  |
| <sup>4</sup> Δ <sub>xy</sub> | δ ↑ π* <sub>xz</sub> ↑ π* <sub>yz</sub> ↑ σ* <sub>xy</sub> ↑ a <sub>1u</sub> ↓ | 3.33           | 0.45 | -0.78 | 0.98    | -0.34 | 0.35 |
| <sup>2</sup> A <sub>1u</sub> | δ <sup>2</sup> π* <sub>xz</sub> ↑ π* <sub>yz</sub> ↑ a <sub>1u</sub> ↓         | 1.12           | 0.90 | -1.02 | 0.77    | -0.28 | 0.51 |
| <sup>4</sup> A <sub>1u</sub> | δ <sup>2</sup> π* <sub>xz</sub> ↑ π* <sub>yz</sub> ↑ a <sub>1u</sub> ↑         | 1.15           | 0.90 | 0.95  | 0.77    | -0.28 | 0.52 |
| <sup>2</sup> A <sub>2u</sub> | δ <sup>2</sup> π* <sub>xz</sub> ↑ π* <sub>yz</sub> ↑ a <sub>2u</sub> ↓         | 1.09           | 0.89 | -0.99 | 0.77    | -0.26 | 0.49 |
| <sup>4</sup> A <sub>2u</sub> | δ <sup>2</sup> π* <sub>xz</sub> ↑ π* <sub>yz</sub> ↑ a <sub>2u</sub> ↑         | 1.13           | 0.91 | 0.95  | 0.77    | -0.26 | 0.49 |
| <sup>6</sup> A <sub>2u</sub> | δ ↑ π* <sub>xz</sub> ↑ π* <sub>yz</sub> ↑ σ* <sub>xy</sub> ↑ a <sub>2u</sub> ↑ | 3.29           | 0.47 | 1.25  | 1.00    | -0.31 | 0.31 |
| <sup>4</sup> Δ <sub>zz</sub> | δ ↑ π* <sub>xz</sub> ↑ π* <sub>yz</sub> ↑ σ* <sub>zz</sub> ↑ a <sub>2u</sub> ↓ | 2.43           | 1.07 | -0.50 | 0.93    | -0.26 | 0.33 |

**Table S6: Group spin densities and charges of different electronic states of [Fe<sup>IV</sup>(O)(Por<sup>+</sup>)]<sup>+</sup> calculated at UB3LYP/BS2//UB3LYP/BS1 in Jaguar.**

|                              |                                                                                | Spin Densities |      |       | Charges |       |      |
|------------------------------|--------------------------------------------------------------------------------|----------------|------|-------|---------|-------|------|
|                              |                                                                                | Fe             | O    | Por   | Fe      | O     | Por  |
| <sup>4</sup> Δ <sub>xy</sub> | δ ↑ π* <sub>xz</sub> ↑ π* <sub>yz</sub> ↑ σ* <sub>xy</sub> ↑ a <sub>1u</sub> ↓ | 3.50           | 0.61 | -1.11 | 0.60    | -0.19 | 0.60 |
| <sup>2</sup> A <sub>1u</sub> | δ <sup>2</sup> π* <sub>xz</sub> ↑ π* <sub>yz</sub> ↑ a <sub>1u</sub> ↓         | 1.16           | 0.88 | -1.04 | 0.40    | -0.18 | 0.78 |
| <sup>4</sup> A <sub>1u</sub> | δ <sup>2</sup> π* <sub>xz</sub> ↑ π* <sub>yz</sub> ↑ a <sub>1u</sub> ↑         | 1.13           | 0.92 | 0.95  | 0.40    | -0.18 | 0.78 |
| <sup>2</sup> A <sub>2u</sub> | δ <sup>2</sup> π* <sub>xz</sub> ↑ π* <sub>yz</sub> ↑ a <sub>2u</sub> ↓         | 1.18           | 0.85 | -1.02 | 0.29    | -0.12 | 0.84 |
| <sup>4</sup> A <sub>2u</sub> | δ <sup>2</sup> π* <sub>xz</sub> ↑ π* <sub>yz</sub> ↑ a <sub>2u</sub> ↑         | 1.18           | 0.87 | 0.95  | 0.28    | -0.13 | 0.84 |
| <sup>6</sup> A <sub>2u</sub> | δ ↑ π* <sub>xz</sub> ↑ π* <sub>yz</sub> ↑ σ* <sub>xy</sub> ↑ a <sub>2u</sub> ↑ | 3.41           | 0.41 | 1.18  | 0.51    | -0.11 | 0.60 |
| <sup>4</sup> Δ <sub>zz</sub> | δ ↑ π* <sub>xz</sub> ↑ π* <sub>yz</sub> ↑ σ* <sub>zz</sub> ↑ a <sub>2u</sub> ↓ | 2.40           | 0.94 | -0.34 | 0.39    | -0.08 | 0.69 |

**Table S7: Group spin densities and charges of optimized geometries of different electronic states of [Fe<sup>IV</sup>(O)(Por<sup>+</sup>)]<sup>+</sup> at UB3LYP/BS2 in Jaguar.**

|                              |                                                                                                  | Spin Densities |      |       | Charges |       |      |
|------------------------------|--------------------------------------------------------------------------------------------------|----------------|------|-------|---------|-------|------|
|                              |                                                                                                  | Fe             | O    | Por   | Fe      | O     | Por  |
| <sup>2</sup> A <sub>1u</sub> | $\delta^2 \pi^*_{xz} \uparrow \pi^*_{yz} \uparrow a_{1u} \downarrow$                             | 1.20           | 0.84 | -1.04 | 0.33    | -0.14 | 0.81 |
| <sup>4</sup> A <sub>1u</sub> | $\delta^2 \pi^*_{xz} \uparrow \pi^*_{yz} \uparrow a_{1u} \uparrow$                               | 1.20           | 0.86 | 0.95  | 0.32    | -0.14 | 0.82 |
| <sup>2</sup> A <sub>2u</sub> | $\delta^2 \pi^*_{xz} \uparrow \pi^*_{yz} \uparrow a_{2u} \downarrow$                             | 1.19           | 0.83 | -1.02 | 0.29    | -0.12 | 0.82 |
| <sup>4</sup> A <sub>2u</sub> | $\delta^2 \pi^*_{xz} \uparrow \pi^*_{yz} \uparrow a_{2u} \uparrow$                               | 1.19           | 0.85 | 0.96  | 0.29    | -0.12 | 0.83 |
| <sup>6</sup> A <sub>2u</sub> | $\delta \uparrow \pi^*_{xz} \uparrow \pi^*_{yz} \uparrow \sigma^*_{xy} \uparrow a_{2u} \uparrow$ | 4.12           | 1.37 | -0.49 | 0.50    | -0.10 | 0.60 |

**Table S8: Group spin densities and charges of optimized geometries of different electronic states of [Fe<sup>IV</sup>(O)(Por<sup>+</sup>)]<sup>+</sup> at UB3LYP-D3/BS2 in Jaguar.**

|                              |                                                                                                  | Spin Densities |      |       | Charges |       |      |
|------------------------------|--------------------------------------------------------------------------------------------------|----------------|------|-------|---------|-------|------|
|                              |                                                                                                  | Fe             | O    | Por   | Fe      | O     | Por  |
| <sup>2</sup> A <sub>1u</sub> | $\delta^2 \pi^*_{xz} \uparrow \pi^*_{yz} \uparrow a_{1u} \downarrow$                             | 1.20           | 0.84 | -1.04 | 0.33    | -0.14 | 0.81 |
| <sup>4</sup> A <sub>1u</sub> | $\delta^2 \pi^*_{xz} \uparrow \pi^*_{yz} \uparrow a_{1u} \uparrow$                               | 1.24           | 0.82 | 0.94  | 0.32    | -0.15 | 0.82 |
| <sup>2</sup> A <sub>2u</sub> | $\delta^2 \pi^*_{xz} \uparrow \pi^*_{yz} \uparrow a_{2u} \downarrow$                             | 1.19           | 0.83 | -1.02 | 0.29    | -0.12 | 0.83 |
| <sup>4</sup> A <sub>2u</sub> | $\delta^2 \pi^*_{xz} \uparrow \pi^*_{yz} \uparrow a_{2u} \uparrow$                               | 1.19           | 0.85 | 0.96  | 0.29    | -0.12 | 0.83 |
| <sup>6</sup> A <sub>2u</sub> | $\delta \uparrow \pi^*_{xz} \uparrow \pi^*_{yz} \uparrow \sigma^*_{xy} \uparrow a_{2u} \uparrow$ | 4.13           | 1.36 | -0.49 | 0.51    | -0.10 | 0.59 |

**Table S9: Group spin densities of optimised Reactant complexes for the epoxidation reaction of  $[\text{Fe}^{\text{IV}}(\text{O})(\text{Por}^{+\bullet})]^+$  with olefins as calculated at UB3LYP/BS1 in Gaussian.**

| Spin                 | Fe   | O    | Por  | Sub  |
|----------------------|------|------|------|------|
| ${}^4\text{Re}_1$    | 1.22 | 0.82 | 0.93 | 0.03 |
| ${}^4\text{Re}_2$    | 1.18 | 0.87 | 0.90 | 0.05 |
| ${}^4\text{Re}_3$    | 1.16 | 0.88 | 0.96 | 0.00 |
| ${}^4\text{Re}_4$    | 1.20 | 0.84 | 0.79 | 0.17 |
| ${}^4\text{Re}_5$    | 1.20 | 0.84 | 0.77 | 0.19 |
| ${}^4\text{Re}_6$    | 1.20 | 0.82 | 0.66 | 0.32 |
| ${}^4\text{Re}_7$    | 1.19 | 0.85 | 0.66 | 0.31 |
| ${}^4\text{Re}_8$    | 1.27 | 0.78 | 0.46 | 0.51 |
| ${}^4\text{Re}_9$    | 1.20 | 0.84 | 0.79 | 0.17 |
| ${}^4\text{Re}_{10}$ | 1.22 | 0.82 | 0.69 | 0.26 |

**Table S10: Group charges of optimised Reactant complexes for the epoxidation reaction of  $[\text{Fe}^{\text{IV}}(\text{O})(\text{Por}^{+\bullet})]^+$  with olefins as calculated at UB3LYP/BS1 in Gaussian.**

| Charge               | Fe  | O    | Por | Sub |
|----------------------|-----|------|-----|-----|
| ${}^4\text{Re}_1$    | 0.9 | -0.3 | 0.3 | 0.1 |
| ${}^4\text{Re}_2$    | 1.0 | -0.3 | 0.3 | 0.1 |
| ${}^4\text{Re}_3$    | 1.1 | -0.3 | 0.2 | 0.0 |
| ${}^4\text{Re}_4$    | 1.0 | -0.4 | 0.0 | 0.4 |
| ${}^4\text{Re}_5$    | 0.5 | 0.0  | 0.4 | 0.1 |
| ${}^4\text{Re}_6$    | 1.0 | -0.4 | 0.1 | 0.3 |
| ${}^4\text{Re}_7$    | 0.9 | -0.3 | 0.1 | 0.3 |
| ${}^4\text{Re}_8$    | 0.5 | 0.1  | 0.2 | 0.3 |
| ${}^4\text{Re}_9$    | 0.5 | -0.1 | 0.6 | 0.0 |
| ${}^4\text{Re}_{10}$ | 0.5 | -0.0 | 0.4 | 0.2 |

**Table S11: Group spin densities of optimised Transition states complexes for the epoxidation reaction of  $[\text{Fe}^{\text{IV}}(\text{O})(\text{Por}^{+\bullet})]^+$  with olefins as calculated at UB3LYP/BS1 in Gaussian.**

| Spin                 | Fe  | O   | Por | Sub |
|----------------------|-----|-----|-----|-----|
| ${}^4\text{TS}_1$    | 1.2 | 0.7 | 0.6 | 0.5 |
| ${}^4\text{TS}_2$    | 1.4 | 0.6 | 0.6 | 0.4 |
| ${}^4\text{TS}_3$    | 1.4 | 0.6 | 0.5 | 0.4 |
| ${}^4\text{TS}_4$    | 1.5 | 0.6 | 0.4 | 0.5 |
| ${}^4\text{TS}_5$    | 1.3 | 0.8 | 0.6 | 0.4 |
| ${}^4\text{TS}_6$    | 1.2 | 0.8 | 0.4 | 0.5 |
| ${}^4\text{TS}_7$    | 1.4 | 0.7 | 0.4 | 0.6 |
| ${}^4\text{TS}_8$    | 1.4 | 0.7 | 0.3 | 0.7 |
| ${}^4\text{TS}_9$    | 1.3 | 0.7 | 0.4 | 0.5 |
| ${}^4\text{TS}_{10}$ | 1.3 | 0.7 | 0.5 | 0.5 |

**Table S12: Group charges of optimised Transition states complexes for the epoxidation reaction of  $[\text{Fe}^{\text{IV}}(\text{O})(\text{Por}^{+\bullet})]^+$  with olefins as calculated at UB3LYP/BS1 in Gaussian.**

| Charge               | Fe  | O    | Por  | Sub  |
|----------------------|-----|------|------|------|
| ${}^4\text{TS}_1$    | 1.0 | 0.2  | 0.1  | -0.3 |
| ${}^4\text{TS}_2$    | 1.1 | -0.7 | 0.3  | 0.4  |
| ${}^4\text{TS}_3$    | 0.5 | 0.1  | 0.4  | 0.1  |
| ${}^4\text{TS}_4$    | 0.5 | 0.6  | 0.2  | -0.2 |
| ${}^4\text{TS}_5$    | 0.5 | 0.4  | 0.2  | -0.1 |
| ${}^4\text{TS}_6$    | 1.3 | -1.2 | 0.2  | 0.7  |
| ${}^4\text{TS}_7$    | 0.4 | 0.5  | 0.1  | 0.0  |
| ${}^4\text{TS}_8$    | 1.0 | -0.4 | -0.2 | 0.7  |
| ${}^4\text{TS}_9$    | 0.5 | 0.1  | 0.4  | 0.1  |
| ${}^4\text{TS}_{10}$ | 0.5 | 0.4  | 0.1  | 0.0  |

**Table S13: Group spin densities of optimised Product complexes for the epoxidation reaction of  $[\text{Fe}^{\text{IV}}(\text{O})(\text{Por}^{+\ast})]^+$  with olefins as calculated at UB3LYP/BS1 in Gaussian.**

| Spin         | Fe   | O    | Por  | Sub  |
|--------------|------|------|------|------|
| ${}^4P_1$    | 2.79 | 0.08 | 0.11 | 0.02 |
| ${}^4P_2$    | 2.88 | 0.06 | 0.04 | 0.02 |
| ${}^4P_3$    | 2.79 | 0.07 | 0.10 | 0.03 |
| ${}^4P_4$    | 2.78 | 0.10 | 0.10 | 0.02 |
| ${}^4P_5$    | 2.90 | 0.07 | 0.01 | 0.02 |
| ${}^4P_6$    | 2.80 | 0.08 | 0.10 | 0.02 |
| ${}^4P_7$    | 2.78 | 0.08 | 0.11 | 0.04 |
| ${}^4P_8$    | 2.80 | 0.06 | 0.10 | 0.05 |
| ${}^4P_9$    | 2.79 | 0.08 | 0.10 | 0.03 |
| ${}^4P_{10}$ | 2.80 | 0.07 | 0.09 | 0.04 |

**Table S14: Group spin densities of optimised Product complexes for the epoxidation reaction of  $[\text{Fe}^{\text{IV}}(\text{O})(\text{Por}^{+\ast})]^+$  with olefins as calculated at UB3LYP/BS1 in Gaussian.**

| Charge       | Fe  | O    | Por  | Sub |
|--------------|-----|------|------|-----|
| ${}^4P_1$    | 0.9 | -0.6 | 0.0  | 0.6 |
| ${}^4P_2$    | 0.9 | -0.6 | 0.0  | 0.7 |
| ${}^4P_3$    | 1.0 | -0.7 | -0.1 | 0.8 |
| ${}^4P_4$    | 1.0 | -0.7 | 0.0  | 0.8 |
| ${}^4P_5$    | 0.9 | -0.7 | 0.0  | 0.7 |
| ${}^4P_6$    | 1.0 | -0.8 | -0.1 | 0.8 |
| ${}^4P_7$    | 1.0 | -0.7 | -0.1 | 0.8 |
| ${}^4P_8$    | 1.1 | -0.9 | -0.1 | 0.9 |
| ${}^4P_9$    | 1.0 | -0.7 | -0.1 | 0.8 |
| ${}^4P_{10}$ | 1.1 | -0.9 | -0.1 | 0.9 |

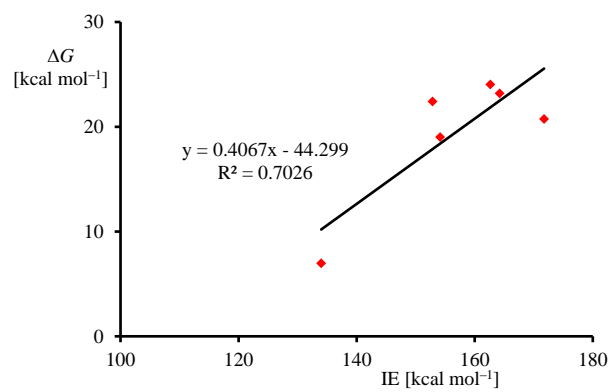

**Figure S1: Correlation between solvent corrected free energies of activation and solvent corrected ionization energies for substrate epoxidation by  $[\text{Fe}^{\text{IV}}(\text{O})(\text{Por}^{*\bullet})]^{\dagger}$ .**



## Cartesian coordinates of optimized geometries:

### UB3LYP/BS1 optimized structures of [Fe<sup>IV</sup>(O)(Por<sup>\*</sup>)]<sup>+</sup>:

<sup>2</sup>A<sub>1u</sub>:

|    |              |              |              |
|----|--------------|--------------|--------------|
| 26 | -0.103433000 | 0.135553000  | 0.033144000  |
| 7  | -0.319522000 | -0.021819000 | 2.019391000  |
| 7  | 1.884889000  | 0.088531000  | 0.277088000  |
| 7  | -2.034934000 | -0.349912000 | -0.182362000 |
| 7  | 0.162366000  | -0.179309000 | -1.928269000 |
| 6  | -1.511424000 | -0.092741000 | 2.726576000  |
| 6  | 2.852098000  | 0.137593000  | -0.722406000 |
| 6  | 0.669385000  | 0.151465000  | 2.982489000  |
| 6  | 2.583910000  | 0.223554000  | 1.468458000  |
| 6  | -3.001320000 | -0.405382000 | 0.817867000  |
| 6  | 1.350821000  | -0.073193000 | -2.636624000 |
| 6  | -2.734062000 | -0.486899000 | -1.373767000 |
| 6  | -0.830572000 | -0.312985000 | -2.893620000 |
| 6  | -1.261448000 | 0.031473000  | 4.160145000  |
| 6  | 4.182141000  | 0.276627000  | -0.134345000 |
| 6  | 0.076328000  | 0.182847000  | 4.317500000  |
| 6  | 4.017069000  | 0.330592000  | 1.209553000  |
| 6  | -4.323893000 | -0.612435000 | 0.233255000  |
| 6  | 1.096503000  | -0.153213000 | -4.072619000 |
| 6  | -4.159864000 | -0.659493000 | -1.110982000 |
| 6  | -0.241925000 | -0.297583000 | -4.230878000 |
| 1  | -2.029463000 | -0.001064000 | 4.918043000  |
| 1  | 5.098525000  | 0.324047000  | -0.703149000 |
| 1  | 0.638299000  | 0.301758000  | 5.231700000  |
| 1  | 4.769087000  | 0.432804000  | 1.977140000  |
| 1  | -5.235344000 | -0.703982000 | 0.804515000  |
| 1  | 1.863145000  | -0.104739000 | -4.831051000 |
| 1  | -4.908241000 | -0.796383000 | -1.876544000 |
| 1  | -0.806062000 | -0.391829000 | -5.146620000 |
| 6  | -2.768700000 | -0.275373000 | 2.172383000  |
| 6  | 2.612209000  | 0.072296000  | -2.080362000 |
| 6  | -2.180659000 | -0.458735000 | -2.644416000 |
| 6  | 2.023075000  | 0.263765000  | 2.735494000  |
| 1  | -3.618493000 | -0.324502000 | 2.842321000  |
| 1  | 3.460480000  | 0.132872000  | -2.751313000 |
| 1  | -2.847107000 | -0.563432000 | -3.491977000 |
| 1  | 2.687666000  | 0.387439000  | 3.581980000  |
| 8  | -0.274177000 | 1.754478000  | -0.055472000 |

<sup>4</sup>A<sub>1u</sub>:

|    |              |              |              |
|----|--------------|--------------|--------------|
| 26 | -0.104054000 | 0.144806000  | 0.032334000  |
| 7  | -0.318981000 | -0.005999000 | 2.019862000  |
| 7  | 1.881966000  | 0.095911000  | 0.277206000  |
| 7  | -2.031477000 | -0.349676000 | -0.183732000 |
| 7  | 0.159387000  | -0.155891000 | -1.930506000 |
| 6  | -1.516162000 | -0.033125000 | 2.722380000  |
| 6  | 2.844853000  | 0.171426000  | -0.721860000 |
| 6  | 0.670648000  | 0.130768000  | 2.984737000  |
| 6  | 2.586877000  | 0.176885000  | 1.473108000  |
| 6  | -3.000049000 | -0.370235000 | 0.813029000  |
| 6  | 1.343927000  | -0.007447000 | -2.639571000 |
| 6  | -2.724799000 | -0.540436000 | -1.373261000 |
| 6  | -0.826328000 | -0.333594000 | -2.893663000 |
| 6  | -1.266017000 | 0.089613000  | 4.157503000  |
| 6  | 4.178935000  | 0.272818000  | -0.134327000 |
| 6  | 0.075621000  | 0.184403000  | 4.318461000  |
| 6  | 4.020860000  | 0.270027000  | 1.211223000  |
| 6  | -4.319646000 | -0.607548000 | 0.232689000  |
| 6  | 1.089227000  | -0.090433000 | -4.076672000 |
| 6  | -4.149807000 | -0.718937000 | -1.106733000 |
| 6  | -0.240685000 | -0.296199000 | -4.231993000 |
| 1  | -2.037501000 | 0.091226000  | 4.912673000  |
| 1  | 5.093001000  | 0.333775000  | -0.705506000 |
| 1  | 0.639741000  | 0.281888000  | 5.233496000  |
| 1  | 4.777233000  | 0.329366000  | 1.978974000  |
| 1  | -5.232621000 | -0.675757000 | 0.804451000  |

|   |              |              |              |
|---|--------------|--------------|--------------|
| 1 | 1.851749000  | -0.007065000 | -4.836313000 |
| 1 | -4.893920000 | -0.897011000 | -1.868034000 |
| 1 | -0.802105000 | -0.416788000 | -5.146140000 |
| 6 | -2.772040000 | -0.198141000 | 2.166275000  |
| 6 | 2.600825000  | 0.149854000  | -2.083348000 |
| 6 | -2.171618000 | -0.531127000 | -2.641378000 |
| 6 | 2.030160000  | 0.199172000  | 2.739255000  |
| 1 | -3.625654000 | -0.217529000 | 2.832735000  |
| 1 | 3.447368000  | 0.237073000  | -2.753559000 |
| 1 | -2.833355000 | -0.675725000 | -3.486707000 |
| 1 | 2.697962000  | 0.285070000  | 3.587834000  |
| 8 | -0.288421000 | 1.769544000  | -0.039665000 |

<sup>2</sup>A<sub>2u</sub>:

|    |              |              |              |
|----|--------------|--------------|--------------|
| 26 | -0.103462000 | 0.131529000  | 0.033848000  |
| 7  | -0.321699000 | -0.008460000 | 2.034736000  |
| 7  | 1.898445000  | 0.085660000  | 0.278586000  |
| 7  | -2.048185000 | -0.351877000 | -0.183348000 |
| 7  | 0.162057000  | -0.166253000 | -1.945090000 |
| 6  | -1.515351000 | -0.073470000 | 2.742523000  |
| 6  | 2.864230000  | 0.135557000  | -0.715011000 |
| 6  | 0.661108000  | 0.159537000  | 2.996730000  |
| 6  | 2.600027000  | 0.212644000  | 1.471591000  |
| 6  | -3.012938000 | -0.409668000 | 0.811080000  |
| 6  | 1.351339000  | -0.058075000 | -2.654505000 |
| 6  | -2.747261000 | -0.499418000 | -1.375580000 |
| 6  | -0.823888000 | -0.303734000 | -2.908810000 |
| 6  | -1.270728000 | 0.046487000  | 4.157527000  |
| 6  | 4.177849000  | 0.270948000  | -0.141017000 |
| 6  | 0.081850000  | 0.190038000  | 4.315423000  |
| 6  | 4.013920000  | 0.318641000  | 1.218000000  |
| 6  | -4.318482000 | -0.617826000 | 0.240583000  |
| 6  | 1.102904000  | -0.137538000 | -4.071847000 |
| 6  | -4.153553000 | -0.673654000 | -1.118041000 |
| 6  | -0.248590000 | -0.290338000 | -4.229685000 |
| 1  | -2.033430000 | 0.016405000  | 4.920817000  |
| 1  | 5.096551000  | 0.322956000  | -0.705647000 |
| 1  | 0.639959000  | 0.300749000  | 5.232883000  |
| 1  | 4.772345000  | 0.417128000  | 1.979766000  |
| 1  | -5.233123000 | -0.706954000 | 0.807120000  |
| 1  | 1.864074000  | -0.088796000 | -4.835695000 |
| 1  | -4.907136000 | -0.817270000 | -1.877284000 |
| 1  | -0.807471000 | -0.390539000 | -5.147830000 |
| 6  | -2.766488000 | -0.264404000 | 2.173977000  |
| 6  | 2.607976000  | 0.080313000  | -2.082756000 |
| 6  | -2.181104000 | -0.462822000 | -2.642291000 |
| 6  | 2.024906000  | 0.257709000  | 2.733895000  |
| 1  | -3.619198000 | -0.308930000 | 2.842870000  |
| 1  | 3.458432000  | 0.145530000  | -2.752835000 |
| 1  | -2.847631000 | -0.571995000 | -3.491002000 |
| 1  | 2.690163000  | 0.377139000  | 3.582232000  |
| 8  | -0.272391000 | 1.746578000  | -0.053805000 |

<sup>4</sup>A<sub>2u</sub>:

|    |              |              |              |
|----|--------------|--------------|--------------|
| 26 | -0.102447000 | 0.128189000  | 0.033271000  |
| 7  | -0.322168000 | -0.010868000 | 2.034437000  |
| 7  | 1.898226000  | 0.104242000  | 0.277458000  |
| 7  | -2.049724000 | -0.344590000 | -0.184051000 |
| 7  | 0.163416000  | -0.166818000 | -1.944253000 |
| 6  | -1.516004000 | -0.051775000 | 2.740631000  |
| 6  | 2.862692000  | 0.171031000  | -0.718130000 |
| 6  | 0.665188000  | 0.129001000  | 2.998768000  |
| 6  | 2.602081000  | 0.194548000  | 1.470525000  |
| 6  | -3.017961000 | -0.375185000 | 0.809829000  |
| 6  | 1.347247000  | -0.030299000 | -2.655387000 |
| 6  | -2.744234000 | -0.525294000 | -1.372408000 |
| 6  | -0.820925000 | -0.336646000 | -2.907235000 |
| 6  | -1.270860000 | 0.057548000  | 4.156527000  |

|   |              |              |              |
|---|--------------|--------------|--------------|
| 6 | 4.177971000  | 0.288465000  | -0.142512000 |
| 6 | 0.084409000  | 0.166185000  | 4.317030000  |
| 6 | 4.016321000  | 0.299305000  | 1.217139000  |
| 6 | -4.322480000 | -0.592990000 | 0.239353000  |
| 6 | 1.100279000  | -0.121596000 | -4.072086000 |
| 6 | -4.152025000 | -0.690061000 | -1.115684000 |
| 6 | -0.246120000 | -0.315263000 | -4.228322000 |
| 1 | -2.035644000 | 0.043747000  | 4.918404000  |
| 1 | 5.095761000  | 0.351382000  | -0.707529000 |
| 1 | 0.643914000  | 0.259416000  | 5.235589000  |
| 1 | 4.775966000  | 0.374296000  | 1.980337000  |
| 1 | -5.239207000 | -0.663001000 | 0.804861000  |
| 1 | 1.859479000  | -0.054280000 | -4.836680000 |
| 1 | -4.902446000 | -0.853534000 | -1.874109000 |
| 1 | -0.802560000 | -0.436058000 | -5.145550000 |
| 6 | -2.771760000 | -0.217696000 | 2.169080000  |
| 6 | 2.603760000  | 0.130525000  | -2.083607000 |
| 6 | -2.173242000 | -0.514978000 | -2.639623000 |
| 6 | 2.027604000  | 0.213363000  | 2.736138000  |
| 1 | -3.625844000 | -0.243263000 | 2.837400000  |
| 1 | 3.451677000  | 0.213145000  | -2.755145000 |
| 1 | -2.836581000 | -0.651167000 | -3.487085000 |
| 1 | 2.695420000  | 0.306678000  | 3.585888000  |
| 8 | -0.278746000 | 1.743296000  | -0.049399000 |

${}^6A_{2u}$ :

|    |              |              |              |
|----|--------------|--------------|--------------|
| 26 | -0.116964000 | 0.267879000  | 0.027245000  |
| 7  | -0.324983000 | -0.019795000 | 2.070798000  |
| 7  | 1.957416000  | 0.087849000  | 0.285631000  |
| 7  | -2.104841000 | -0.370096000 | -0.190205000 |
| 7  | 0.168146000  | -0.178047000 | -1.979040000 |
| 6  | -1.520559000 | -0.108790000 | 2.766368000  |
| 6  | 2.911325000  | 0.118960000  | -0.716756000 |
| 6  | 0.670047000  | 0.140064000  | 3.022133000  |
| 6  | 2.643221000  | 0.208180000  | 1.481724000  |
| 6  | -3.055090000 | -0.436556000 | 0.814428000  |
| 6  | 1.364046000  | -0.089132000 | -2.674362000 |
| 6  | -2.787987000 | -0.518680000 | -1.384877000 |
| 6  | -0.827591000 | -0.328329000 | -2.931620000 |
| 6  | -1.268769000 | -0.003044000 | 4.184848000  |
| 6  | 4.228983000  | 0.248558000  | -0.135185000 |
| 6  | 0.085299000  | 0.150883000  | 4.342984000  |
| 6  | 4.063115000  | 0.303883000  | 1.224982000  |
| 6  | -4.364024000 | -0.647367000 | 0.237257000  |
| 6  | 1.112224000  | -0.186796000 | -4.093222000 |
| 6  | -4.198871000 | -0.697414000 | -1.123290000 |
| 6  | -0.242639000 | -0.333010000 | -4.252349000 |
| 1  | -2.024924000 | -0.048981000 | 4.954045000  |
| 1  | 5.152529000  | 0.290411000  | -0.692699000 |
| 1  | 0.637632000  | 0.254161000  | 5.264844000  |
| 1  | 4.826263000  | 0.399437000  | 1.982713000  |
| 1  | -5.281630000 | -0.744099000 | 0.798000000  |
| 1  | 1.870458000  | -0.155121000 | -4.861122000 |
| 1  | -4.956898000 | -0.841886000 | -1.878365000 |
| 1  | -0.793633000 | -0.442476000 | -5.174209000 |
| 6  | -2.775454000 | -0.303911000 | 2.178365000  |
| 6  | 2.625471000  | 0.046493000  | -2.083690000 |
| 6  | -2.189071000 | -0.484781000 | -2.648380000 |
| 6  | 2.037056000  | 0.243224000  | 2.741635000  |
| 1  | -3.621668000 | -0.366362000 | 2.855566000  |
| 1  | 3.473327000  | 0.093298000  | -2.760096000 |
| 1  | -2.849562000 | -0.601326000 | -3.502085000 |
| 1  | 2.698431000  | 0.353996000  | 3.595438000  |
| 8  | -0.286970000 | 1.901541000  | -0.061685000 |

${}^4A_{zz}$ :

|    |              |              |              |
|----|--------------|--------------|--------------|
| 26 | -0.103910000 | 0.139639000  | 0.032909000  |
| 7  | -0.317957000 | -0.035385000 | 2.019437000  |
| 7  | 1.885422000  | 0.090994000  | 0.276058000  |
| 7  | -2.035460000 | -0.350418000 | -0.181539000 |
| 7  | 0.163989000  | -0.192614000 | -1.926680000 |

|   |              |              |              |
|---|--------------|--------------|--------------|
| 6 | -1.520436000 | -0.099114000 | 2.730507000  |
| 6 | 2.855985000  | 0.150746000  | -0.728785000 |
| 6 | 0.675847000  | 0.139077000  | 2.987077000  |
| 6 | 2.587485000  | 0.230781000  | 1.477640000  |
| 6 | -3.008020000 | -0.392135000 | 0.822618000  |
| 6 | 1.361151000  | -0.076911000 | -2.640132000 |
| 6 | -2.738315000 | -0.484270000 | -1.383517000 |
| 6 | -0.833863000 | -0.327725000 | -2.896739000 |
| 6 | -1.262302000 | 0.012905000  | 4.141389000  |
| 6 | 4.161323000  | 0.297146000  | -0.141969000 |
| 6 | 0.085215000  | 0.158384000  | 4.298753000  |
| 6 | 3.996682000  | 0.345471000  | 1.211706000  |
| 6 | -4.308288000 | -0.584565000 | 0.238212000  |
| 6 | 1.101009000  | -0.166879000 | -4.052238000 |
| 6 | -4.142841000 | -0.641377000 | -1.115075000 |
| 6 | -0.245633000 | -0.320830000 | -4.209669000 |
| 1 | -2.025557000 | -0.022601000 | 4.903988000  |
| 1 | 5.079291000  | 0.352389000  | -0.707329000 |
| 1 | 0.644490000  | 0.266454000  | 5.215547000  |
| 1 | 4.752972000  | 0.448395000  | 1.975132000  |
| 1 | -5.223333000 | -0.666151000 | 0.805092000  |
| 1 | 1.863599000  | -0.121507000 | -4.814972000 |
| 1 | -4.895580000 | -0.778422000 | -1.876605000 |
| 1 | -0.804824000 | -0.426270000 | -5.126998000 |
| 6 | -2.771897000 | -0.267991000 | 2.176019000  |
| 6 | 2.614051000  | 0.079505000  | -2.084991000 |
| 6 | -2.183035000 | -0.467423000 | -2.646035000 |
| 6 | 2.027177000  | 0.259210000  | 2.737674000  |
| 1 | -3.622129000 | -0.312975000 | 2.845679000  |
| 1 | 3.462243000  | 0.143876000  | -2.755661000 |
| 1 | -2.848279000 | -0.575548000 | -3.494034000 |
| 1 | 2.690923000  | 0.378960000  | 3.585322000  |
| 8 | -0.278226000 | 1.787178000  | -0.053095000 |

${}^4A_{xy}$ :

|    |              |              |              |
|----|--------------|--------------|--------------|
| 26 | -0.121384000 | 0.303413000  | 0.024472000  |
| 7  | -0.322354000 | -0.042118000 | 2.074837000  |
| 7  | 1.936799000  | 0.068922000  | 0.283692000  |
| 7  | -2.080355000 | -0.385497000 | -0.187006000 |
| 7  | 0.170701000  | -0.197177000 | -1.981846000 |
| 6  | -1.516956000 | -0.136417000 | 2.766896000  |
| 6  | 2.889789000  | 0.096531000  | -0.720209000 |
| 6  | 0.673049000  | 0.113539000  | 3.022978000  |
| 6  | 2.621210000  | 0.191580000  | 1.481025000  |
| 6  | -3.029539000 | -0.452348000 | 0.819196000  |
| 6  | 1.366722000  | -0.115238000 | -2.673346000 |
| 6  | -2.762306000 | -0.532518000 | -1.383081000 |
| 6  | -0.824711000 | -0.351639000 | -2.930697000 |
| 6  | -1.260878000 | -0.031243000 | 4.208527000  |
| 6  | 4.225734000  | 0.225222000  | -0.128091000 |
| 6  | 0.078659000  | 0.121709000  | 4.365309000  |
| 6  | 4.061318000  | 0.285540000  | 1.218158000  |
| 6  | -4.356084000 | -0.668375000 | 0.231638000  |
| 6  | 1.110846000  | -0.218476000 | -4.114938000 |
| 6  | -4.192719000 | -0.716692000 | -1.115303000 |
| 6  | -0.229807000 | -0.359924000 | -4.272766000 |
| 1  | -2.022267000 | -0.075544000 | 4.972529000  |
| 1  | 5.146121000  | 0.263670000  | -0.690971000 |
| 1  | 0.636253000  | 0.228716000  | 5.283691000  |
| 1  | 4.819680000  | 0.383572000  | 1.980215000  |
| 1  | -5.270458000 | -0.764553000 | 0.797678000  |
| 1  | 1.873964000  | -0.186680000 | -4.877861000 |
| 1  | -4.946143000 | -0.860048000 | -1.875016000 |
| 1  | -0.786799000 | -0.467270000 | -5.191424000 |
| 6  | -2.768132000 | -0.329155000 | 2.183440000  |
| 6  | 2.624037000  | 0.017900000  | -2.086858000 |
| 6  | -2.181425000 | -0.506868000 | -2.650644000 |
| 6  | 2.034921000  | 0.220912000  | 2.745718000  |
| 1  | -3.618050000 | -0.396512000 | 2.853734000  |
| 1  | 3.477134000  | 0.056955000  | -2.755373000 |
| 1  | -2.847323000 | -0.628643000 | -3.497945000 |

|   |              |             |              |
|---|--------------|-------------|--------------|
| 1 | 2.702492000  | 0.328070000 | 3.593698000  |
| 8 | -0.304127000 | 1.962255000 | -0.050453000 |

**UB3LYP/BS2 optimized structures of [Fe<sup>IV</sup>(O)(Por<sup>\*</sup>)]<sup>+</sup>:**

<sup>2</sup>A<sub>1u</sub>:

|    |              |              |              |
|----|--------------|--------------|--------------|
| 26 | -0.104137718 | 0.142270073  | 0.033080591  |
| 7  | -0.317126903 | -0.035454178 | 2.017444298  |
| 7  | 1.884075130  | 0.095784451  | 0.276767720  |
| 7  | -2.035674735 | -0.344334042 | -0.182723810 |
| 7  | 0.163118771  | -0.190193541 | -1.924671036 |
| 6  | -1.495872221 | -0.099843616 | 2.714757220  |
| 6  | 2.837596251  | 0.156372480  | -0.712839795 |
| 6  | 0.661436837  | 0.128241330  | 2.969870147  |
| 6  | 2.573807475  | 0.226678564  | 1.454606204  |
| 6  | -2.991495523 | -0.383782070 | 0.805707167  |
| 6  | 1.336937640  | -0.080059192 | -2.624434011 |
| 6  | -2.724710754 | -0.481996234 | -1.360241882 |
| 6  | -0.817539751 | -0.334355502 | -2.878068926 |
| 6  | -1.253162647 | 0.009229166  | 4.144952913  |
| 6  | 4.163914524  | 0.308240540  | -0.133732682 |
| 6  | 0.077315285  | 0.147903111  | 4.302662735  |
| 6  | 4.001266546  | 0.348955672  | 1.202780923  |
| 6  | -4.313657250 | -0.574626244 | 0.228618105  |
| 6  | 1.092437819  | -0.172538890 | -4.055517441 |
| 6  | -4.148606256 | -0.637579901 | -1.106735111 |
| 6  | -0.235928829 | -0.331076830 | -4.212116966 |
| 1  | -2.023219008 | -0.022835284 | 4.902316667  |
| 1  | 5.079259913  | 0.370095153  | -0.704666422 |
| 1  | 0.641262506  | 0.254535438  | 5.218217177  |
| 1  | 4.753437083  | 0.451895537  | 1.971713663  |
| 1  | -5.227727721 | -0.648461955 | 0.800171019  |
| 1  | 1.860490887  | -0.121754710 | -4.813887650 |
| 1  | -4.897129720 | -0.774414996 | -1.873939232 |
| 1  | -0.799716701 | -0.439705823 | -5.127534645 |
| 6  | -2.754660414 | -0.261561991 | 2.159547582  |
| 6  | 2.595382966  | 0.084780484  | -2.069322428 |
| 6  | -2.167513567 | -0.473123947 | -2.628508705 |
| 6  | 2.013298670  | 0.249163602  | 2.721275412  |
| 1  | -3.603902389 | -0.301428201 | 2.830421282  |
| 1  | 3.441329019  | 0.155968409  | -2.741765552 |
| 1  | -2.833223356 | -0.582141686 | -3.475751276 |
| 1  | 2.677958373  | 0.368033819  | 3.568015329  |
| 8  | -0.272172340 | 1.739312368  | -0.051585953 |

<sup>4</sup>A<sub>1u</sub>:

|    |              |              |              |
|----|--------------|--------------|--------------|
| 26 | -0.105016286 | 0.151949482  | 0.032292800  |
| 7  | -0.318522801 | -0.010939953 | 2.017258470  |
| 7  | 1.880439942  | 0.097006175  | 0.276550028  |
| 7  | -2.030864018 | -0.347098137 | -0.182977815 |
| 7  | 0.160127042  | -0.161640879 | -1.926887313 |
| 6  | -1.502016493 | -0.039489256 | 2.712170427  |
| 6  | 2.832194815  | 0.174090144  | -0.711287570 |
| 6  | 0.660222060  | 0.124284830  | 2.970953948  |
| 6  | 2.576708482  | 0.180962536  | 1.458591107  |
| 6  | -2.988657512 | -0.366035279 | 0.802054769  |
| 6  | 1.331182984  | -0.015602697 | -2.628309647 |
| 6  | -2.716346050 | -0.531604511 | -1.359359654 |
| 6  | -0.814644395 | -0.336508869 | -2.878817102 |
| 6  | -1.259299093 | 0.078172065  | 4.142123297  |
| 6  | 4.162542016  | 0.282026075  | -0.132889978 |
| 6  | 0.074866558  | 0.172475470  | 4.302052850  |
| 6  | 4.005327011  | 0.279527517  | 1.205033853  |
| 6  | -4.306213039 | -0.595869275 | 0.229993051  |
| 6  | 1.084916611  | -0.101518705 | -4.059844701 |
| 6  | -4.137119698 | -0.705807684 | -1.101956772 |
| 6  | -0.237521785 | -0.306250387 | -4.213898404 |
| 1  | -2.031810108 | 0.077300412  | 4.897722950  |
| 1  | 5.076861903  | 0.346286638  | -0.705255113 |
| 1  | 0.640507338  | 0.267006689  | 5.217926418  |
| 1  | 4.761863163  | 0.342007088  | 1.974088656  |
| 1  | -5.220405088 | -0.661672878 | 0.802386579  |

|   |              |              |              |
|---|--------------|--------------|--------------|
| 1 | 1.848881745  | -0.020299178 | -4.819761889 |
| 1 | -4.881718643 | -0.881477580 | -1.865101003 |
| 1 | -0.799916203 | -0.430016289 | -5.128280850 |
| 6 | -2.757401225 | -0.198363789 | 2.154565894  |
| 6 | 2.586087215  | 0.148258949  | -2.071374266 |
| 6 | -2.160166210 | -0.526075221 | -2.625282157 |
| 6 | 2.018250690  | 0.199145875  | 2.723171365  |
| 1 | -3.610907589 | -0.215603419 | 2.821221225  |
| 1 | 3.431878335  | 0.238116323  | -2.741999510 |
| 1 | -2.821743416 | -0.668438122 | -3.470976450 |
| 1 | 2.685779156  | 0.287210691  | 3.571588140  |
| 8 | -0.283736501 | 1.751406703  | -0.041849555 |

<sup>2</sup>A<sub>2u</sub>:

|    |              |              |              |
|----|--------------|--------------|--------------|
| 26 | -0.103312209 | 0.135496126  | 0.033084565  |
| 7  | -0.321578073 | -0.013341923 | 2.031802126  |
| 7  | 1.896536433  | 0.107529751  | 0.277563203  |
| 7  | -2.049305400 | -0.339425908 | -0.184623772 |
| 7  | 0.163316620  | -0.168680040 | -1.941339988 |
| 6  | -1.498704725 | -0.062530494 | 2.730557616  |
| 6  | 2.851432235  | 0.169643333  | -0.708376703 |
| 6  | 0.655901293  | 0.128524599  | 2.986294948  |
| 6  | 2.591989391  | 0.202994269  | 1.454397159  |
| 6  | -3.006954850 | -0.375185312 | 0.799924862  |
| 6  | 1.332386144  | -0.042676493 | -2.644094857 |
| 6  | -2.736704237 | -0.511554389 | -1.357473428 |
| 6  | -0.811583909 | -0.334498099 | -2.894719490 |
| 6  | -1.263546371 | 0.041749792  | 4.141646350  |
| 6  | 4.163549628  | 0.291336247  | -0.141504026 |
| 6  | 0.084364583  | 0.158180601  | 4.302072301  |
| 6  | 4.001263870  | 0.308780139  | 1.211252111  |
| 6  | -4.309510929 | -0.587680597 | 0.237788287  |
| 6  | 1.096284983  | -0.137130395 | -4.055660586 |
| 6  | -4.139752396 | -0.676339164 | -1.111266303 |
| 6  | -0.244347201 | -0.322497501 | -4.212556630 |
| 1  | -2.030337397 | 0.020039950  | 4.902651079  |
| 1  | 5.081860780  | 0.351433978  | -0.707756009 |
| 1  | 0.645074026  | 0.252335781  | 5.220951810  |
| 1  | 4.759648596  | 0.387525801  | 1.976895437  |
| 1  | -5.226357336 | -0.661437730 | 0.804810622  |
| 1  | 1.859040577  | -0.077037081 | -4.818653914 |
| 1  | -4.889603143 | -0.836060540 | -1.872683507 |
| 1  | -0.801969302 | -0.444107454 | -5.130081955 |
| 6  | -2.756682036 | -0.227664800 | 2.156457895  |
| 6  | 2.590686791  | 0.119998996  | -2.069977042 |
| 6  | -2.162023865 | -0.502394465 | -2.625995662 |
| 6  | 2.014339181  | 0.221329564  | 2.721522834  |
| 1  | -3.608947014 | -0.258423048 | 2.825953818  |
| 1  | 3.437820844  | 0.198223329  | -2.742132996 |
| 1  | -2.825940701 | -0.633782697 | -3.473038491 |
| 1  | 2.681782899  | 0.319297142  | 3.570318296  |
| 8  | -0.275507106 | 1.727844859  | -0.048830329 |

<sup>4</sup>A<sub>2u</sub>:

|    |              |              |              |
|----|--------------|--------------|--------------|
| 26 | -0.103360774 | 0.135960311  | 0.033060581  |
| 7  | -0.321105256 | -0.015085333 | 2.031679442  |
| 7  | 1.896577190  | 0.106336697  | 0.277174990  |
| 7  | -2.049091284 | -0.340685362 | -0.184061424 |
| 7  | 0.163345155  | -0.171294102 | -1.940940915 |
| 6  | -1.500784599 | -0.061787143 | 2.731016144  |
| 6  | 2.850565311  | 0.171824452  | -0.706686062 |
| 6  | 0.654453949  | 0.124479968  | 2.985684757  |
| 6  | 2.592619018  | 0.202316344  | 1.456324611  |
| 6  | -3.006590243 | -0.372695114 | 0.798027529  |
| 6  | 1.334347163  | -0.042147820 | -2.644586847 |
| 6  | -2.737083634 | -0.513179048 | -1.359231465 |
| 6  | -0.809304590 | -0.338144521 | -2.893631549 |
| 6  | -1.264157841 | 0.042102469  | 4.142223011  |
| 6  | 4.162709930  | 0.295909493  | -0.141016308 |
| 6  | 0.083985147  | 0.155073045  | 4.301653692  |
| 6  | 4.001726918  | 0.311606318  | 1.211749428  |

|   |              |              |              |
|---|--------------|--------------|--------------|
| 6 | -4.309674804 | -0.582952250 | 0.236863468  |
| 6 | 1.096774876  | -0.136485476 | -4.056240301 |
| 6 | -4.140742122 | -0.674224382 | -1.111949643 |
| 6 | -0.243413167 | -0.324916602 | -4.211787897 |
| 1 | -2.030473561 | 0.022467054  | 4.903759855  |
| 1 | 5.080300069  | 0.359071090  | -0.708088777 |
| 1 | 0.645549252  | 0.247701442  | 5.220152928  |
| 1 | 4.760630932  | 0.391608097  | 1.976754073  |
| 1 | -5.226492303 | -0.653221864 | 0.804358599  |
| 1 | 1.858587127  | -0.074150671 | -4.819996741 |
| 1 | -4.891317445 | -0.833095643 | -1.872834467 |
| 1 | -0.801740683 | -0.447082060 | -5.128803064 |
| 6 | -2.755786305 | -0.224312516 | 2.157478878  |
| 6 | 2.589211527  | 0.122260760  | -2.071262445 |
| 6 | -2.162669058 | -0.506659290 | -2.624364272 |
| 6 | 2.015857935  | 0.217552115  | 2.720369319  |
| 1 | -3.608764109 | -0.252946410 | 2.826211430  |
| 1 | 3.436628829  | 0.202610532  | -2.742851558 |
| 1 | -2.825759061 | -0.639143639 | -3.471912949 |
| 1 | 2.682771514  | 0.314233754  | 3.569766747  |
| 8 | -0.275607002 | 1.728493549  | -0.049354018 |

<sup>6</sup>A<sub>2u</sub>:

|    |              |              |              |
|----|--------------|--------------|--------------|
| 26 | -0.115820473 | 0.251362987  | 0.026801482  |
| 7  | -0.323960474 | 0.010842219  | 2.067998774  |
| 7  | 1.951190585  | 0.057259280  | 0.288425184  |
| 7  | -2.092056021 | -0.399435645 | -0.191295811 |
| 7  | 0.161616665  | -0.148038613 | -1.981417378 |
| 6  | -1.509100715 | -0.091359957 | 2.757789962  |
| 6  | 2.895078827  | 0.094714253  | -0.704624716 |
| 6  | 0.663304888  | 0.134357589  | 3.015771187  |
| 6  | 2.634397644  | 0.162963248  | 1.471188601  |
| 6  | -3.033825204 | -0.457023935 | 0.802834291  |
| 6  | 1.349386769  | -0.071701455 | -2.670000412 |
| 6  | -2.769366964 | -0.560590326 | -1.371219664 |
| 6  | -0.819033768 | -0.333680231 | -2.925834143 |
| 6  | -1.264608134 | -0.005115855 | 4.168098402  |
| 6  | 4.211410563  | 0.208510972  | -0.132483791 |
| 6  | 0.086070815  | 0.134264226  | 4.328690405  |
| 6  | 4.049655251  | 0.250053976  | 1.219604874  |
| 6  | -4.338595520 | -0.679875871 | 0.236322015  |
| 6  | 1.107784473  | -0.186162829 | -4.078862269 |
| 6  | -4.174325319 | -0.745129232 | -1.114539706 |
| 6  | -0.240244804 | -0.349782886 | -4.238048030 |
| 1  | -2.021513247 | -0.053959038 | 4.937997578  |
| 1  | 5.134202341  | 0.254893608  | -0.693079251 |
| 1  | 0.637501210  | 0.221183948  | 5.254121069  |
| 1  | 4.814541048  | 0.337402769  | 1.978094061  |
| 1  | -5.256894355 | -0.769343430 | 0.799050854  |
| 1  | 1.866646030  | -0.155786283 | -4.847784095 |
| 1  | -4.932378131 | -0.897717802 | -1.869570474 |
| 1  | -0.787466747 | -0.477492397 | -5.161234569 |
| 6  | -2.758566143 | -0.302122150 | 2.164354098  |
| 6  | 2.608651421  | 0.046414526  | -2.071780507 |
| 6  | -2.175058201 | -0.521221671 | -2.635459701 |
| 6  | 2.031487300  | 0.206521556  | 2.731255751  |
| 1  | -3.606063802 | -0.365953895 | 2.838674557  |
| 1  | 3.458272249  | 0.090933369  | -2.744993332 |
| 1  | -2.835096137 | -0.659422710 | -3.485309826 |
| 1  | 2.696597930  | 0.297821594  | 3.583475974  |
| 8  | -0.320659538 | 2.126562505  | -0.053741288 |

**UB3LYP-D3 optimized structures of [Fe<sup>IV</sup>(O)(Por<sup>••</sup>)]<sup>+</sup>:**

<sup>2</sup>A<sub>1u</sub>:

|    |              |              |              |
|----|--------------|--------------|--------------|
| 26 | -0.104137718 | 0.142270073  | 0.033080591  |
| 7  | -0.317126903 | -0.035454178 | 2.017444298  |
| 7  | 1.884075130  | 0.095784451  | 0.276767720  |
| 7  | -2.035674735 | -0.344334042 | -0.182723810 |
| 7  | 0.163118771  | -0.190193541 | -1.924671036 |
| 6  | -1.495872221 | -0.099843616 | 2.714757220  |
| 6  | 2.837596251  | 0.156372480  | -0.712839795 |

|   |              |              |              |
|---|--------------|--------------|--------------|
| 6 | 0.661436837  | 0.128241330  | 2.969870147  |
| 6 | 2.573807475  | 0.226678564  | 1.454606204  |
| 6 | -2.991495523 | -0.383782070 | 0.805707167  |
| 6 | 1.336937640  | -0.080059192 | -2.624434011 |
| 6 | -2.724710754 | -0.481996234 | -1.360241882 |
| 6 | -0.817539751 | -0.334355502 | -2.878068926 |
| 6 | -1.253162647 | 0.009229166  | 4.144952913  |
| 6 | 4.163914524  | 0.308240540  | -0.133732682 |
| 6 | 0.077315285  | 0.147903111  | 4.302662735  |
| 6 | 4.001266546  | 0.348955672  | 1.202780923  |
| 6 | -4.313657250 | -0.574626244 | 0.228618105  |
| 6 | 1.092437819  | -0.172538890 | -4.055517441 |
| 6 | -4.148606256 | -0.637579901 | -1.106735111 |
| 6 | -0.235928829 | -0.331076830 | -4.212116966 |
| 1 | -2.023219008 | -0.022835284 | 4.902316667  |
| 1 | 5.079259913  | 0.370095153  | -0.704666422 |
| 1 | 0.641262506  | 0.254535438  | 5.218217177  |
| 1 | 4.753437083  | 0.451895537  | 1.971713663  |
| 1 | -5.227727721 | -0.648461955 | 0.800171019  |
| 1 | 1.860490887  | -0.121754710 | -4.813887650 |
| 1 | -4.897129720 | -0.774414996 | -1.873939232 |
| 1 | -0.799716701 | -0.439705823 | -5.127534645 |
| 6 | -2.754660414 | -0.261561991 | 2.159547582  |
| 6 | 2.595382966  | 0.084780484  | -2.069322428 |
| 6 | -2.167513567 | -0.473123947 | -2.628508705 |
| 6 | 2.013298670  | 0.249163602  | 2.721275412  |
| 1 | -3.603902389 | -0.301428201 | 2.830421282  |
| 1 | 3.441329019  | 0.155968409  | -2.741765552 |
| 1 | -2.833223356 | -0.582141686 | -3.475751276 |
| 1 | 2.677958373  | 0.368033819  | 3.568015329  |
| 8 | -0.272172340 | 1.739312368  | -0.051585953 |

<sup>4</sup>A<sub>1u</sub>:

|    |              |              |              |
|----|--------------|--------------|--------------|
| 26 | -0.102510279 | 0.130834346  | 0.033876603  |
| 7  | -0.317670380 | -0.036320699 | 2.016963876  |
| 7  | 1.885331306  | 0.085004985  | 0.277729741  |
| 7  | -2.033789212 | -0.355652528 | -0.179521170 |
| 7  | 0.167322391  | -0.216201473 | -1.922036345 |
| 6  | -1.501819582 | -0.065101336 | 2.713541966  |
| 6  | 2.834297344  | 0.181456662  | -0.711309303 |
| 6  | 0.662114787  | 0.106458616  | 2.969875511  |
| 6  | 2.577099595  | 0.199066026  | 1.458980887  |
| 6  | -2.992126018 | -0.366454638 | 0.804665425  |
| 6  | 1.338244944  | -0.066475324 | -2.623921799 |
| 6  | -2.722027525 | -0.502623704 | -1.359748587 |
| 6  | -0.812547257 | -0.358032256 | -2.874163715 |
| 6  | -1.257312555 | 0.055415877  | 4.142389670  |
| 6  | 4.160075724  | 0.338360397  | -0.133406765 |
| 6  | 0.077207746  | 0.153133233  | 4.300968942  |
| 6  | 4.002557315  | 0.340454534  | 1.204807148  |
| 6  | -4.313809791 | -0.561961955 | 0.228978120  |
| 6  | 1.089337222  | -0.140850369 | -4.055505036 |
| 6  | -4.147250450 | -0.646142849 | -1.105382075 |
| 6  | -0.236722737 | -0.322579695 | -4.209781980 |
| 1  | -2.029324758 | 0.054901832  | 4.898386293  |
| 1  | 5.071755112  | 0.426245839  | -0.706610374 |
| 1  | 0.643553943  | 0.251705130  | 5.215872101  |
| 1  | 4.756102112  | 0.431269605  | 1.973917652  |
| 1  | -5.228244002 | -0.624328953 | 0.801239832  |
| 1  | 1.853167324  | -0.059371181 | -4.815321323 |
| 1  | -4.894867485 | -0.791362091 | -1.871871085 |
| 1  | -0.803492288 | -0.422358452 | -5.124384976 |
| 6  | -2.759149473 | -0.212670757 | 2.158671214  |
| 6  | 2.590179533  | 0.128753000  | -2.070789136 |
| 6  | -2.164690407 | -0.501670619 | -2.624742263 |
| 6  | 2.018636214  | 0.204965641  | 2.723717154  |
| 1  | -3.611977509 | -0.222871111 | 2.826068721  |
| 1  | 3.432291294  | 0.235652191  | -2.743309929 |
| 1  | -2.829601055 | -0.608256538 | -3.472978921 |
| 1  | 2.683356032  | 0.308456231  | 3.572497820  |
| 8  | -0.267060003 | 1.725266049  | -0.090126312 |

<sup>2</sup>A<sub>2u</sub>:

|    |              |              |              |
|----|--------------|--------------|--------------|
| 26 | -0.103312209 | 0.135496126  | 0.033084565  |
| 7  | -0.321578073 | -0.013341923 | 2.031802126  |
| 7  | 1.896536433  | 0.107529751  | 0.277563203  |
| 7  | -2.049305400 | -0.339425908 | -0.184623772 |
| 7  | 0.163316620  | -0.168680040 | -1.941339988 |
| 6  | -1.498704725 | -0.062530494 | 2.730557616  |
| 6  | 2.851432235  | 0.169643333  | -0.708376703 |
| 6  | 0.655901293  | 0.128524599  | 2.986294948  |
| 6  | 2.591989391  | 0.202994269  | 1.454397159  |
| 6  | -3.006954850 | -0.375185312 | 0.799924862  |
| 6  | 1.332386144  | -0.042676493 | -2.644094857 |
| 6  | -2.736704237 | -0.511554389 | -1.357473428 |
| 6  | -0.811583909 | -0.334498099 | -2.894719490 |
| 6  | -1.263546371 | 0.041749792  | 4.141646350  |
| 6  | 4.163549628  | 0.291336247  | -0.141504026 |
| 6  | 0.084364583  | 0.158180601  | 4.302072301  |
| 6  | 4.001263870  | 0.308780139  | 1.211252111  |
| 6  | -4.309510929 | -0.587680597 | 0.237788287  |
| 6  | 1.096284983  | -0.137130395 | -4.055660586 |
| 6  | -4.139752396 | -0.676339164 | -1.111266303 |
| 6  | -0.244347201 | -0.322497501 | -4.212556630 |
| 1  | -2.030337397 | 0.020039950  | 4.902651079  |
| 1  | 5.081860780  | 0.351433978  | -0.707756009 |
| 1  | 0.645074026  | 0.252335781  | 5.220951810  |
| 1  | 4.759648596  | 0.387525801  | 1.976895437  |
| 1  | -5.226357336 | -0.661437730 | 0.804810622  |
| 1  | 1.859040577  | -0.077037081 | -4.818653914 |
| 1  | -4.889603143 | -0.836060540 | -1.872683507 |
| 1  | -0.801969302 | -0.444107454 | -5.130081955 |
| 6  | -2.756682036 | -0.227664800 | 2.156457895  |
| 6  | 2.590686791  | 0.119998996  | -2.069977042 |
| 6  | -2.162023865 | -0.502394465 | -2.625995662 |
| 6  | 2.014339181  | 0.221329564  | 2.721522834  |
| 1  | -3.608947014 | -0.258423048 | 2.825953818  |
| 1  | 3.437820844  | 0.198223329  | -2.742132996 |
| 1  | -2.825940701 | -0.633782697 | -3.473038491 |
| 1  | 2.681782899  | 0.319297142  | 3.570318296  |
| 8  | -0.275507106 | 1.727844859  | -0.048830329 |

<sup>4</sup>A<sub>2u</sub>:

|    |              |              |              |
|----|--------------|--------------|--------------|
| 26 | -0.103360774 | 0.135960311  | 0.033060581  |
| 7  | -0.321105256 | -0.015085333 | 2.031679442  |
| 7  | 1.896577190  | 0.106336697  | 0.277174990  |
| 7  | -2.049091284 | -0.340685362 | -0.184061424 |
| 7  | 0.163334515  | -0.171294102 | -1.940940915 |
| 6  | -1.500784599 | -0.061787143 | 2.731016144  |
| 6  | 2.850565311  | 0.171824452  | -0.706686062 |
| 6  | 0.654453949  | 0.124479968  | 2.985684757  |
| 6  | 2.592619018  | 0.202316344  | 1.456324611  |
| 6  | -3.006590243 | -0.372695114 | 0.798027529  |
| 6  | 1.334347163  | -0.042147820 | -2.644586847 |
| 6  | -2.737083634 | -0.513179048 | -1.359231465 |
| 6  | -0.809304590 | -0.338144521 | -2.893631549 |
| 6  | -1.264157841 | 0.042102469  | 4.142223011  |
| 6  | 4.162709930  | 0.295909493  | -0.141016308 |
| 6  | 0.083985147  | 0.155073045  | 4.301653692  |
| 6  | 4.001726918  | 0.311606318  | 1.211749428  |
| 6  | -4.309674804 | -0.582952250 | 0.236863468  |
| 6  | 1.096774876  | -0.136485476 | -4.056240301 |
| 6  | -4.140742122 | -0.674224382 | -1.111949643 |
| 6  | -0.243413167 | -0.324916602 | -4.211787897 |
| 1  | -2.030473561 | 0.022467054  | 4.903759855  |
| 1  | 5.080300069  | 0.359071090  | -0.708088777 |
| 1  | 0.645549252  | 0.247701442  | 5.220152928  |
| 1  | 4.760630932  | 0.391608097  | 1.976754073  |
| 1  | -5.226492303 | -0.653221864 | 0.804358599  |
| 1  | 1.858587127  | -0.074150671 | -4.819996741 |
| 1  | -4.891317445 | -0.833095643 | -1.872834467 |
| 1  | -0.801740683 | -0.447082060 | -5.128803064 |

|   |              |              |              |
|---|--------------|--------------|--------------|
| 6 | -2.755786305 | -0.224312516 | 2.157478878  |
| 6 | 2.589211527  | 0.122260760  | -2.071262445 |
| 6 | -2.162669058 | -0.506659290 | -2.624364272 |
| 6 | 2.015857935  | 0.217552115  | 2.720369319  |
| 1 | -3.608764109 | -0.252946410 | 2.826211430  |
| 1 | 3.436628829  | 0.202610532  | -2.742851558 |
| 1 | -2.825759061 | -0.639143639 | -3.471912949 |
| 1 | 2.682771514  | 0.314233754  | 3.569766747  |
| 8 | -0.275607002 | 1.728493549  | -0.049354018 |

<sup>6</sup>A<sub>2u</sub>:

|    |              |              |              |
|----|--------------|--------------|--------------|
| 26 | -0.116158881 | 0.255837971  | 0.026552464  |
| 7  | -0.324150153 | 0.008951446  | 2.067473213  |
| 7  | 1.949927217  | 0.056581641  | 0.287881219  |
| 7  | -2.090868620 | -0.399198987 | -0.190778641 |
| 7  | 0.161997288  | -0.149457449 | -1.980631495 |
| 6  | -1.509658218 | -0.094093124 | 2.757174784  |
| 6  | 2.893798424  | 0.095156162  | -0.705617755 |
| 6  | 0.663892400  | 0.132704603  | 3.014884867  |
| 6  | 2.632467239  | 0.164284918  | 1.471300230  |
| 6  | -3.032707260 | -0.455939285 | 0.803747508  |
| 6  | 1.350313434  | -0.074077043 | -2.669008325 |
| 6  | -2.767938316 | -0.558713204 | -1.371450680 |
| 6  | -0.819539558 | -0.335099492 | -2.924738821 |
| 6  | -1.264638475 | -0.009758415 | 4.167783657  |
| 6  | 4.210163824  | 0.210277962  | -0.133133790 |
| 6  | 0.086948654  | 0.130346184  | 4.328226521  |
| 6  | 4.047968298  | 0.252386177  | 1.219898954  |
| 6  | -4.337780672 | -0.677910927 | 0.236899076  |
| 6  | 1.108628515  | -0.190621171 | -4.077954602 |
| 6  | -4.173276640 | -0.742711919 | -1.114952380 |
| 6  | -0.240485823 | -0.353706773 | -4.237073205 |
| 1  | -2.022087990 | -0.060553328 | 4.936940595  |
| 1  | 5.132377752  | 0.256718884  | -0.694564533 |
| 1  | 0.639726154  | 0.215997680  | 5.252903989  |
| 1  | 4.811757342  | 0.340337451  | 1.979349864  |
| 1  | -5.255432918 | -0.767315439 | 0.800602569  |
| 1  | 1.868429511  | -0.162066624 | -4.845941570 |
| 1  | -4.930314986 | -0.894875538 | -1.870990653 |
| 1  | -0.788747354 | -0.482907470 | -5.159381831 |
| 6  | -2.759363836 | -0.303179158 | 2.165271785  |
| 6  | 2.609613514  | 0.045378455  | -2.072548945 |
| 6  | -2.175469913 | -0.520850307 | -2.635902673 |
| 6  | 2.031596050  | 0.206812651  | 2.731659199  |
| 1  | -3.607138298 | -0.367288135 | 2.839225847  |
| 1  | 3.459452107  | 0.089881629  | -2.745496594 |
| 1  | -2.835873715 | -0.658594795 | -3.485548260 |
| 1  | 2.697055538  | 0.298835917  | 3.583542157  |
| 8  | -0.319651980 | 2.125117404  | -0.054207363 |

**UB3LYP/BS2 optimized geometries of epoxidation reactant complexes between [Fe<sup>IV</sup>(O)(Por<sup>\*\*\*</sup>)]<sup>+</sup> with substrates:**

<sup>4</sup>Re<sub>1</sub>:

|    |              |              |              |
|----|--------------|--------------|--------------|
| 26 | -0.073869000 | 0.084049000  | 0.007613000  |
| 7  | -0.065813000 | -0.054984000 | 2.013980000  |
| 7  | 1.935236000  | -0.002209000 | 0.027345000  |
| 7  | -2.037496000 | -0.356710000 | 0.018111000  |
| 7  | -0.036028000 | -0.296338000 | -1.969513000 |
| 6  | -1.153256000 | -0.108238000 | 2.848747000  |
| 6  | 2.788876000  | -0.006348000 | -1.090342000 |
| 6  | 1.043430000  | 0.105702000  | 2.861253000  |
| 6  | 2.762090000  | 0.143396000  | 1.112021000  |
| 6  | -2.889768000 | -0.372149000 | 1.136749000  |
| 6  | 1.051311000  | -0.262609000 | -2.802834000 |
| 6  | -2.864364000 | -0.493751000 | -1.066951000 |
| 6  | -1.148650000 | -0.440916000 | -2.819506000 |
| 6  | -0.749422000 | 0.003833000  | 4.238646000  |
| 6  | 4.170248000  | 0.127941000  | -0.656083000 |
| 6  | 0.604275000  | 0.137630000  | 4.247690000  |
| 6  | 4.152764000  | 0.219942000  | 0.700843000  |
| 6  | -4.268627000 | -0.537723000 | 0.703610000  |

|   |              |              |              |
|---|--------------|--------------|--------------|
| 6 | 0.648755000  | -0.397716000 | -4.192780000 |
| 6 | -4.251760000 | -0.613898000 | -0.654165000 |
| 6 | -0.706660000 | -0.505029000 | -4.203730000 |
| 1 | -1.427459000 | -0.021438000 | 5.078177000  |
| 1 | 5.021837000  | 0.143076000  | -1.319670000 |
| 1 | 1.263358000  | 0.243825000  | 5.096268000  |
| 1 | 4.987014000  | 0.326560000  | 1.377567000  |
| 1 | -5.117201000 | -0.590147000 | 1.369161000  |
| 1 | 1.330298000  | -0.408900000 | -5.029923000 |
| 1 | -5.083656000 | -0.740990000 | -1.330243000 |
| 1 | -1.364734000 | -0.623350000 | -5.051498000 |
| 6 | -2.489015000 | -0.253727000 | 2.438543000  |
| 6 | 2.387249000  | -0.121560000 | -2.392500000 |
| 6 | -2.449951000 | -0.525186000 | -2.409392000 |
| 6 | 2.344670000  | 0.204171000  | 2.451632000  |
| 1 | -3.247800000 | -0.278564000 | 3.212048000  |
| 1 | 3.147337000  | -0.110331000 | -3.165188000 |
| 1 | -3.218872000 | -0.635932000 | -3.165286000 |
| 1 | 3.111601000  | 0.325780000  | 3.207793000  |
| 8 | -0.221451000 | 1.705721000  | -0.079065000 |
| 6 | -0.964343000 | 4.191534000  | -0.809717000 |
| 1 | -1.414021000 | 4.342922000  | 0.166287000  |
| 1 | -1.652091000 | 4.051359000  | -1.638807000 |
| 6 | 0.363865000  | 4.180959000  | -0.982232000 |
| 1 | 0.813971000  | 4.030849000  | -1.959547000 |
| 1 | 1.050252000  | 4.324833000  | -0.153022000 |

<sup>4</sup>Re<sub>2</sub>:

|    |              |              |              |
|----|--------------|--------------|--------------|
| 26 | 0.272537000  | 0.166521000  | -0.129297000 |
| 7  | 0.146303000  | 0.018811000  | 1.868774000  |
| 7  | 2.257424000  | -0.112961000 | 0.006871000  |
| 7  | -1.718066000 | -0.059426000 | -0.238358000 |
| 7  | 0.393117000  | -0.215715000 | -2.100045000 |
| 6  | -1.022601000 | 0.133992000  | 2.642671000  |
| 6  | 3.164401000  | -0.142439000 | -1.027747000 |
| 6  | 1.178057000  | 0.001805000  | 2.775156000  |
| 6  | 3.031907000  | -0.105551000 | 1.175649000  |
| 6  | -2.620360000 | 0.083668000  | 0.784370000  |
| 6  | 1.561441000  | -0.235685000 | -2.878218000 |
| 6  | -2.497036000 | -0.166234000 | -1.405828000 |
| 6  | -0.641930000 | -0.307319000 | -3.000623000 |
| 6  | -0.679535000 | 0.170250000  | 4.053393000  |
| 6  | 4.524127000  | -0.162558000 | -0.525171000 |
| 6  | 0.675505000  | 0.081424000  | 4.135020000  |
| 6  | 4.444066000  | -0.145580000 | 0.833636000  |
| 6  | -3.985101000 | 0.054790000  | 0.283099000  |
| 6  | 1.215976000  | -0.352502000 | -4.285933000 |
| 6  | -3.909216000 | -0.106526000 | -1.064152000 |
| 6  | -0.141664000 | -0.404446000 | -4.359152000 |
| 1  | -1.397583000 | 0.244790000  | 4.856273000  |
| 1  | 5.407004000  | -0.194323000 | -1.145457000 |
| 1  | 1.295690000  | 0.071426000  | 5.018595000  |
| 1  | 5.248106000  | -0.158260000 | 1.554220000  |
| 1  | -4.866123000 | 0.138462000  | 0.901334000  |
| 1  | 1.934668000  | -0.396565000 | -5.090552000 |
| 1  | -4.714768000 | -0.180246000 | -1.779248000 |
| 1  | -0.763909000 | -0.497634000 | -5.236291000 |
| 6  | -2.295981000 | 0.190463000  | 2.145921000  |
| 6  | 2.839746000  | -0.183220000 | -2.390910000 |
| 6  | -2.006533000 | -0.290760000 | -2.676424000 |
| 6  | 2.540510000  | -0.060383000 | 2.453407000  |
| 1  | -3.115615000 | 0.291035000  | 2.847951000  |
| 1  | 3.659365000  | -0.202814000 | -3.099759000 |
| 1  | -2.714651000 | -0.368415000 | -3.493225000 |
| 1  | 3.248430000  | -0.063478000 | 3.274101000  |
| 8  | 0.277958000  | 1.795683000  | -0.210239000 |
| 6  | -2.048593000 | 3.742351000  | 0.774365000  |
| 1  | -2.040906000 | 3.572645000  | 1.846569000  |
| 1  | -3.022747000 | 3.771545000  | 0.292356000  |
| 6  | -0.907425000 | 3.934661000  | 0.077172000  |
| 1  | 0.039609000  | 3.955671000  | 0.609292000  |

|   |              |             |              |
|---|--------------|-------------|--------------|
| 6 | -0.853584000 | 4.275529000 | -1.383982000 |
| 1 | -0.168826000 | 3.605397000 | -1.915331000 |
| 1 | -1.841596000 | 4.214025000 | -1.852568000 |
| 1 | -0.475562000 | 5.297587000 | -1.526355000 |

<sup>4</sup>Re<sub>3</sub>:

|    |              |              |              |
|----|--------------|--------------|--------------|
| 26 | 0.034537000  | 1.375821000  | -0.211480000 |
| 7  | -0.076880000 | 1.534307000  | 1.785008000  |
| 7  | 2.033678000  | 1.293840000  | -0.059447000 |
| 7  | -1.925694000 | 0.950363000  | -0.253668000 |
| 7  | 0.184720000  | 0.710669000  | -2.098317000 |
| 6  | -1.218194000 | 1.616054000  | 2.551191000  |
| 6  | 2.948918000  | 1.142387000  | -1.109712000 |
| 6  | 0.978111000  | 1.813205000  | 2.664249000  |
| 6  | 2.797245000  | 1.598772000  | 1.045254000  |
| 6  | -2.842056000 | 1.114504000  | 0.793873000  |
| 6  | 1.325833000  | 0.632847000  | -2.865316000 |
| 6  | -2.690154000 | 0.657453000  | -1.361053000 |
| 6  | -0.871252000 | 0.445775000  | -2.980652000 |
| 6  | -0.891474000 | 1.931219000  | 3.936212000  |
| 6  | 4.308352000  | 1.345809000  | -0.618894000 |
| 6  | 0.457477000  | 2.054093000  | 4.006301000  |
| 6  | 4.214221000  | 1.625253000  | 0.704930000  |
| 6  | -4.200339000 | 0.897174000  | 0.305989000  |
| 6  | 1.000668000  | 0.297427000  | -4.245940000 |
| 6  | -4.105980000 | 0.615925000  | -1.017469000 |
| 6  | -0.348970000 | 0.183641000  | -4.318074000 |
| 1  | -1.619309000 | 2.037735000  | 4.726235000  |
| 1  | 5.194794000  | 1.274759000  | -1.231042000 |
| 1  | 1.069427000  | 2.281435000  | 4.866204000  |
| 1  | 5.007099000  | 1.832920000  | 1.407359000  |
| 1  | -5.085979000 | 0.956982000  | 0.920504000  |
| 1  | 1.729939000  | 0.172180000  | -5.031882000 |
| 1  | -4.898008000 | 0.397206000  | -1.717511000 |
| 1  | -0.959962000 | -0.055734000 | -5.175394000 |
| 6  | -2.523580000 | 1.425721000  | 2.090052000  |
| 6  | 2.629776000  | 0.840950000  | -2.408047000 |
| 6  | -2.200957000 | 0.424516000  | -2.649096000 |
| 6  | 2.306610000  | 1.849823000  | 2.329373000  |
| 1  | -3.329953000 | 1.525820000  | 2.806630000  |
| 1  | 3.435319000  | 0.752282000  | -3.127047000 |
| 1  | -2.920681000 | 0.207828000  | -3.429350000 |
| 1  | 3.025204000  | 2.081035000  | 3.106484000  |
| 8  | -0.084270000 | 2.958712000  | -0.553235000 |
| 6  | -0.282029000 | 6.390459000  | -0.852327000 |
| 1  | -0.360535000 | 5.882562000  | 0.104298000  |
| 1  | -0.362860000 | 5.757226000  | -1.732847000 |
| 6  | -0.094211000 | 7.712458000  | -0.946628000 |
| 1  | -0.023356000 | 8.308219000  | -0.034148000 |
| 6  | 0.013765000  | 8.488715000  | -2.235566000 |
| 1  | 0.999489000  | 8.976631000  | -2.286173000 |
| 1  | -0.037333000 | 7.797534000  | -3.087483000 |
| 6  | -1.078954000 | 9.570499000  | -2.373646000 |
| 1  | -1.038636000 | 10.280749000 | -1.538791000 |
| 1  | -0.953628000 | 10.137955000 | -3.302500000 |
| 1  | -2.077097000 | 9.118411000  | -2.380283000 |

<sup>4</sup>Re<sub>4</sub>:

|    |              |              |              |
|----|--------------|--------------|--------------|
| 26 | 0.354875000  | 0.215175000  | 0.026306000  |
| 7  | 0.260280000  | -0.153201000 | 1.991030000  |
| 7  | 2.318194000  | -0.159314000 | 0.089018000  |
| 7  | -1.639159000 | 0.077720000  | -0.061484000 |
| 7  | 0.418020000  | 0.051364000  | -1.969268000 |
| 6  | -0.870063000 | -0.219396000 | 2.784194000  |
| 6  | 3.201344000  | -0.222072000 | -0.990468000 |
| 6  | 1.334719000  | -0.174653000 | 2.882130000  |
| 6  | 3.118468000  | -0.177847000 | 1.214653000  |
| 6  | -2.532452000 | -0.040933000 | 1.005861000  |
| 6  | 1.534270000  | -0.045080000 | -2.768915000 |
| 6  | -2.427953000 | 0.279046000  | -1.174986000 |
| 6  | -0.653743000 | 0.244922000  | -2.854626000 |

|   |              |              |              |
|---|--------------|--------------|--------------|
| 6 | -0.508435000 | -0.302530000 | 4.188148000  |
| 6 | 4.571718000  | -0.303525000 | -0.510293000 |
| 6 | 0.849088000  | -0.262795000 | 4.250538000  |
| 6 | 4.519574000  | -0.265380000 | 0.848404000  |
| 6 | -3.902965000 | 0.054565000  | 0.522276000  |
| 6 | 1.174998000  | 0.064673000  | -4.171169000 |
| 6 | -3.835774000 | 0.264428000  | -0.819275000 |
| 6 | -0.170993000 | 0.255272000  | -4.223493000 |
| 1 | -1.220475000 | -0.376679000 | 4.996667000  |
| 1 | 5.437975000  | -0.374365000 | -1.151517000 |
| 1 | 1.487156000  | -0.300778000 | 5.121142000  |
| 1 | 5.333328000  | -0.302562000 | 1.557323000  |
| 1 | -4.777059000 | -0.030804000 | 1.150966000  |
| 1 | 1.880685000  | 0.005341000  | -4.986531000 |
| 1 | -4.643720000 | 0.384430000  | -1.525791000 |
| 1 | -0.802033000 | 0.379752000  | -5.091137000 |
| 6 | -2.183284000 | -0.189527000 | 2.326259000  |
| 6 | 2.845432000  | -0.184901000 | -2.315142000 |
| 6 | -1.965691000 | 0.382295000  | -2.489404000 |
| 6 | 2.662296000  | -0.160502000 | 2.530093000  |
| 1 | -2.976619000 | -0.264951000 | 3.060422000  |
| 1 | 3.632012000  | -0.244369000 | -3.058108000 |
| 1 | -2.701596000 | 0.534459000  | -3.270220000 |
| 1 | 3.402072000  | -0.177431000 | 3.321614000  |
| 8 | 0.448811000  | 1.838917000  | 0.090997000  |
| 6 | -2.420968000 | 3.366223000  | -0.818851000 |
| 1 | -3.104609000 | 3.109679000  | -1.627877000 |
| 6 | -1.112639000 | 3.601325000  | -1.110339000 |
| 1 | -0.454223000 | 3.922140000  | -0.308818000 |
| 6 | -2.992580000 | 3.478722000  | 0.556745000  |
| 1 | -3.837289000 | 4.182566000  | 0.582390000  |
| 1 | -3.389653000 | 2.509618000  | 0.896971000  |
| 1 | -2.234685000 | 3.808662000  | 1.275415000  |
| 6 | -0.511336000 | 3.491654000  | -2.471855000 |
| 1 | -0.014628000 | 4.429763000  | -2.758392000 |
| 1 | 0.264256000  | 2.712448000  | -2.472512000 |
| 1 | -1.258339000 | 3.244038000  | -3.233394000 |

<sup>4</sup>Re<sub>5</sub>:

|    |              |              |              |
|----|--------------|--------------|--------------|
| 26 | 0.212906000  | -0.825517000 | 0.163381000  |
| 7  | 0.277683000  | -0.909486000 | 2.167944000  |
| 7  | 2.206919000  | -1.055644000 | 0.124552000  |
| 7  | -1.770200000 | -1.130406000 | 0.250350000  |
| 7  | 0.159184000  | -1.275313000 | -1.793361000 |
| 6  | -0.788662000 | -0.853604000 | 3.039821000  |
| 6  | 3.020220000  | -1.143463000 | -1.014144000 |
| 6  | 1.418833000  | -0.808807000 | 2.975227000  |
| 6  | 3.079854000  | -0.937694000 | 1.184456000  |
| 6  | -2.583319000 | -1.042576000 | 1.388714000  |
| 6  | 1.225150000  | -1.335426000 | -2.664543000 |
| 6  | -2.643214000 | -1.250137000 | -0.809611000 |
| 6  | -0.982625000 | -1.375146000 | -2.601154000 |
| 6  | -0.327420000 | -0.732815000 | 4.412636000  |
| 6  | 4.422311000  | -1.092069000 | -0.628453000 |
| 6  | 1.030587000  | -0.704154000 | 4.373813000  |
| 6  | 4.458180000  | -0.966126000 | 0.724008000  |
| 6  | -3.984888000 | -1.125963000 | 1.006006000  |
| 6  | 0.764552000  | -1.489507000 | -4.034592000 |
| 6  | -4.020697000 | -1.254921000 | -0.346215000 |
| 6  | -0.593511000 | -1.512835000 | -3.996504000 |
| 1  | -0.976815000 | -0.682077000 | 5.273489000  |
| 1  | 5.248556000  | -1.151549000 | -1.320902000 |
| 1  | 1.725816000  | -0.625539000 | 5.196131000  |
| 1  | 5.320082000  | -0.900330000 | 1.370666000  |
| 1  | -4.810473000 | -1.093432000 | 1.701051000  |
| 1  | 1.414769000  | -1.570735000 | -4.892509000 |
| 1  | -4.881904000 | -1.349270000 | -0.990245000 |
| 1  | -1.288024000 | -1.618002000 | -4.816451000 |
| 6  | -2.136515000 | -0.909238000 | 2.678282000  |
| 6  | 2.572960000  | -1.267174000 | -2.304340000 |
| 6  | -2.278480000 | -1.358888000 | -2.153561000 |

|   |              |              |              |
|---|--------------|--------------|--------------|
| 6 | 2.714736000  | -0.814881000 | 2.526912000  |
| 1 | -2.872366000 | -0.853040000 | 3.471740000  |
| 1 | 3.308702000  | -1.325480000 | -3.097747000 |
| 1 | -3.073682000 | -1.445650000 | -2.884540000 |
| 1 | 3.509830000  | -0.728931000 | 3.258100000  |
| 8 | 0.181292000  | 0.793552000  | 0.014582000  |
| 6 | -0.743367000 | 4.539801000  | -1.746061000 |
| 1 | -0.647842000 | 4.291435000  | -2.801716000 |
| 6 | -1.818282000 | 5.251932000  | -1.326749000 |
| 1 | -2.556790000 | 5.585819000  | -2.053188000 |
| 6 | -2.049550000 | 5.626480000  | 0.113065000  |
| 1 | -1.869467000 | 6.708776000  | 0.233885000  |
| 1 | -3.109528000 | 5.482915000  | 0.367663000  |
| 6 | 0.299388000  | 4.764166000  | 0.550627000  |
| 1 | 0.942869000  | 4.230687000  | 1.260049000  |
| 1 | 0.700294000  | 5.783643000  | 0.459107000  |
| 6 | -1.146066000 | 4.832555000  | 1.079501000  |
| 1 | -1.171670000 | 5.289597000  | 2.075662000  |
| 1 | -1.536962000 | 3.810191000  | 1.184199000  |
| 6 | 0.347313000  | 4.067884000  | -0.825484000 |
| 1 | 0.259632000  | 2.974120000  | -0.689167000 |
| 1 | 1.325975000  | 4.222387000  | -1.303377000 |

<sup>4</sup>Re<sub>6</sub>:

|    |              |              |              |
|----|--------------|--------------|--------------|
| 26 | 0.209263000  | 0.144992000  | -0.336025000 |
| 7  | 0.256537000  | 0.340266000  | 1.668301000  |
| 7  | 2.150712000  | -0.374259000 | -0.295482000 |
| 7  | -1.797766000 | 0.138245000  | -0.250153000 |
| 7  | 0.098132000  | -0.549222000 | -2.215552000 |
| 6  | -0.790264000 | 0.668173000  | 2.498816000  |
| 6  | 2.945436000  | -0.732130000 | -1.390506000 |
| 6  | 1.400825000  | 0.381142000  | 2.482515000  |
| 6  | 3.027812000  | -0.249062000 | 0.762660000  |
| 6  | -2.595285000 | 0.486136000  | 0.851173000  |
| 6  | 1.147904000  | -0.872819000 | -3.048017000 |
| 6  | -2.676973000 | -0.001937000 | -1.302222000 |
| 6  | -1.043235000 | -0.593311000 | -3.029254000 |
| 6  | -0.321353000 | 0.910784000  | 3.850108000  |
| 6  | 4.333757000  | -0.841623000 | -0.981952000 |
| 6  | 1.028342000  | 0.734995000  | 3.840225000  |
| 6  | 4.382680000  | -0.544285000 | 0.346593000  |
| 6  | -3.990580000 | 0.538290000  | 0.455711000  |
| 6  | 0.676914000  | -1.136158000 | -4.392657000 |
| 6  | -4.039087000 | 0.235883000  | -0.872245000 |
| 6  | -0.673841000 | -0.963646000 | -4.381821000 |
| 1  | -0.958851000 | 1.169988000  | 4.681924000  |
| 1  | 5.145520000  | -1.114942000 | -1.639401000 |
| 1  | 1.723257000  | 0.821021000  | 4.662196000  |
| 1  | 5.242473000  | -0.525164000 | 0.999108000  |
| 1  | -4.809114000 | 0.757786000  | 1.125104000  |
| 1  | 1.311115000  | -1.419010000 | -5.219269000 |
| 1  | -4.904841000 | 0.166802000  | -1.513652000 |
| 1  | -1.371867000 | -1.077098000 | -5.197737000 |
| 6  | -2.134410000 | 0.745021000  | 2.116066000  |
| 6  | 2.488852000  | -0.954871000 | -2.665335000 |
| 6  | -2.324590000 | -0.337122000 | -2.612759000 |
| 6  | 2.679355000  | 0.110957000  | 2.067952000  |
| 1  | -2.856956000 | 1.008698000  | 2.879347000  |
| 1  | 3.211875000  | -1.223564000 | -3.426789000 |
| 1  | -3.122310000 | -0.409895000 | -3.343026000 |
| 1  | 3.476645000  | 0.171891000  | 2.799683000  |
| 8  | 0.403183000  | 1.723611000  | -0.697128000 |
| 6  | -0.460084000 | 4.073775000  | -0.505663000 |
| 1  | 0.223956000  | 3.982341000  | -1.340607000 |
| 6  | -1.793816000 | 4.157061000  | -0.724664000 |
| 1  | -2.181752000 | 4.090222000  | -1.737867000 |
| 6  | -2.798141000 | 4.311065000  | 0.378826000  |
| 1  | -3.434605000 | 5.195030000  | 0.191249000  |
| 1  | -3.515319000 | 3.466513000  | 0.341276000  |
| 6  | -0.861569000 | 4.371558000  | 1.966070000  |
| 1  | -0.472182000 | 4.467534000  | 2.976830000  |

|   |              |             |             |
|---|--------------|-------------|-------------|
| 6 | -2.191941000 | 4.402088000 | 1.750647000 |
| 1 | -2.878086000 | 4.522031000 | 2.585840000 |
| 6 | 0.145898000  | 4.240021000 | 0.858985000 |
| 1 | 0.826580000  | 3.397194000 | 1.059459000 |
| 1 | 0.809228000  | 5.125104000 | 0.858725000 |

<sup>4</sup>Re<sub>2</sub>:

|    |              |              |              |
|----|--------------|--------------|--------------|
| 26 | -0.016601000 | 0.118405000  | -0.345723000 |
| 7  | -0.206178000 | -1.117506000 | 1.227814000  |
| 7  | 0.221991000  | -1.485758000 | -1.531014000 |
| 7  | -0.776523000 | 1.603027000  | 0.775652000  |
| 7  | -0.350623000 | 1.234480000  | -1.982523000 |
| 6  | -0.463572000 | -0.753384000 | 2.556290000  |
| 6  | 0.387204000  | -1.494123000 | -2.899429000 |
| 6  | 0.098510000  | -2.461465000 | 1.272921000  |
| 6  | 0.479385000  | -2.801203000 | -1.120936000 |
| 6  | -0.957328000 | 1.607946000  | 2.142760000  |
| 6  | -0.109693000 | 0.866542000  | -3.313570000 |
| 6  | -1.028106000 | 2.919641000  | 0.366603000  |
| 6  | -0.654933000 | 2.578416000  | -2.027915000 |
| 6  | -0.324795000 | -1.910280000 | 3.423735000  |
| 6  | 0.736426000  | -2.822207000 | -3.368142000 |
| 6  | 0.020829000  | -2.961775000 | 2.632601000  |
| 6  | 0.795225000  | -3.627328000 | -2.273135000 |
| 6  | -1.339944000 | 2.928046000  | 2.606989000  |
| 6  | -0.287269000 | 2.014321000  | -4.185605000 |
| 6  | -1.381809000 | 3.736998000  | 1.513943000  |
| 6  | -0.622989000 | 3.067990000  | -3.393290000 |
| 1  | -0.483199000 | -1.895868000 | 4.491696000  |
| 1  | 0.904627000  | -3.081185000 | -4.402621000 |
| 1  | 0.204791000  | -3.986370000 | 2.918824000  |
| 1  | 1.020913000  | -4.682137000 | -2.225585000 |
| 1  | -1.548628000 | 3.178021000  | 3.636279000  |
| 1  | -0.170891000 | 1.990488000  | -5.258757000 |
| 1  | -1.632341000 | 4.785984000  | 1.463263000  |
| 1  | -0.838127000 | 4.085300000  | -3.683487000 |
| 6  | -0.805825000 | 0.504247000  | 2.984462000  |
| 6  | 0.236692000  | -0.389954000 | -3.741068000 |
| 6  | -0.966037000 | 3.376677000  | -0.925359000 |
| 6  | 0.429978000  | -3.255035000 | 0.172637000  |
| 1  | -0.981198000 | 0.653088000  | 4.043551000  |
| 1  | 0.395416000  | -0.542560000 | -4.802243000 |
| 1  | -1.185913000 | 4.421934000  | -1.108452000 |
| 1  | 0.649796000  | -4.300362000 | 0.355839000  |
| 8  | 1.557985000  | 0.476394000  | -0.155351000 |
| 6  | 4.579208000  | 1.467471000  | 0.018031000  |
| 1  | 4.198075000  | 1.738135000  | 0.996444000  |
| 1  | 4.189631000  | 2.035997000  | -0.817905000 |
| 6  | 5.479125000  | 0.473195000  | -0.175392000 |
| 1  | 5.806923000  | 0.271557000  | -1.193882000 |
| 6  | 6.089315000  | -0.370629000 | 0.845650000  |
| 6  | 5.772770000  | -0.268703000 | 2.225808000  |
| 6  | 6.394055000  | -1.092089000 | 3.158780000  |
| 6  | 7.346368000  | -2.040168000 | 2.744861000  |
| 6  | 7.671002000  | -2.157894000 | 1.384188000  |
| 6  | 7.050421000  | -1.334609000 | 0.448149000  |
| 1  | 5.040646000  | 0.458442000  | 2.558702000  |
| 1  | 6.146167000  | -1.000411000 | 4.210860000  |
| 1  | 7.831358000  | -2.677517000 | 3.476562000  |
| 1  | 8.407232000  | -2.886645000 | 1.062944000  |
| 1  | 7.304506000  | -1.421649000 | -0.603992000 |

<sup>4</sup>Re<sub>3</sub>:

|    |              |             |              |
|----|--------------|-------------|--------------|
| 26 | 0.222312000  | 1.317321000 | 0.148566000  |
| 7  | 0.059111000  | 1.170981000 | 2.145182000  |
| 7  | 2.218457000  | 1.367638000 | 0.355192000  |
| 7  | -1.685877000 | 0.715814000 | -0.012201000 |
| 7  | 0.472368000  | 0.918027000 | -1.800729000 |
| 6  | -1.113952000 | 1.034804000 | 2.881967000  |
| 6  | 3.164427000  | 1.428130000 | -0.663182000 |
| 6  | 1.058248000  | 1.403857000 | 3.085804000  |

|   |              |             |              |
|---|--------------|-------------|--------------|
| 6 | 2.933962000  | 1.573810000 | 1.530901000  |
| 6 | -2.629403000 | 0.638698000 | 1.007904000  |
| 6 | 1.647635000  | 1.036658000 | -2.536476000 |
| 6 | -2.400780000 | 0.506265000 | -1.187234000 |
| 6 | -0.525484000 | 0.681682000 | -2.741481000 |
| 6 | -0.836720000 | 1.173857000 | 4.300466000  |
| 6 | 4.487197000  | 1.660144000 | -0.110649000 |
| 6 | 0.498951000  | 1.401218000 | 4.425742000  |
| 6 | 4.345448000  | 1.750062000 | 1.238462000  |
| 6 | -3.945056000 | 0.362464000 | 0.458694000  |
| 6 | 1.377078000  | 0.857050000 | -3.951846000 |
| 6 | -3.804562000 | 0.281581000 | -0.891114000 |
| 6 | 0.040900000  | 0.639424000 | -4.077923000 |
| 1 | -1.580708000 | 1.090222000 | 5.078611000  |
| 1 | 5.389783000  | 1.733796000 | -0.698556000 |
| 1 | 1.075358000  | 1.542302000 | 5.327883000  |
| 1 | 5.107923000  | 1.912542000 | 1.985442000  |
| 1 | -4.840690000 | 0.244314000 | 1.049979000  |
| 1 | 2.129248000  | 0.890065000 | -4.725748000 |
| 1 | -4.561172000 | 0.083259000 | -1.635381000 |
| 1 | -0.528927000 | 0.457069000 | -4.976719000 |
| 6 | -2.369807000 | 0.792250000 | 2.356772000  |
| 6 | 2.903349000  | 1.280282000 | -2.012544000 |
| 6 | -1.866535000 | 0.497022000 | -2.462200000 |
| 6 | 2.397847000  | 1.599015000 | 2.804633000  |
| 1 | -3.200815000 | 0.705098000 | 3.046812000  |
| 1 | 3.737018000  | 1.347447000 | -2.701553000 |
| 1 | -2.538646000 | 0.318603000 | -3.293254000 |
| 1 | 3.071988000  | 1.768280000 | 3.635988000  |
| 8 | -0.035198000 | 2.923513000 | 0.026328000  |
| 6 | -0.428450000 | 6.701946000 | -2.650861000 |
| 6 | -0.652004000 | 7.081513000 | -1.225337000 |
| 6 | -0.600503000 | 6.199642000 | -0.181851000 |
| 1 | -0.383554000 | 5.154890000 | -0.401638000 |
| 1 | -0.866421000 | 8.133211000 | -1.040610000 |
| 1 | 0.411376000  | 7.268559000 | -3.078878000 |
| 1 | -1.304839000 | 6.955366000 | -3.265032000 |
| 1 | -0.221244000 | 5.634069000 | -2.763872000 |
| 6 | -0.806795000 | 6.507285000 | 1.218906000  |
| 6 | -0.705230000 | 5.441389000 | 2.158732000  |
| 6 | -0.891590000 | 5.671733000 | 3.517669000  |
| 6 | -1.183970000 | 6.965999000 | 3.978147000  |
| 6 | -1.289074000 | 8.032908000 | 3.064345000  |
| 6 | -1.104103000 | 7.811774000 | 1.706355000  |
| 1 | -1.188557000 | 8.643788000 | 1.016641000  |
| 1 | -1.515256000 | 9.030426000 | 3.424542000  |
| 1 | -1.329507000 | 7.147207000 | 5.037799000  |
| 1 | -0.810678000 | 4.850624000 | 4.221943000  |
| 1 | -0.479105000 | 4.446661000 | 1.787068000  |

**UB3LYP/BS2 optimized geometries of epoxidation Transition states for the reaction of [Fe<sup>V</sup>(O)(Por<sup>+</sup>)]<sup>+</sup> with substrates:**

<sup>4</sup>TS<sub>1</sub>:

|    |              |              |              |
|----|--------------|--------------|--------------|
| 26 | -0.040890000 | 0.181714000  | -0.093164000 |
| 7  | -0.132215000 | -0.058861000 | 1.903447000  |
| 7  | 1.971124000  | 0.033839000  | 0.028167000  |
| 7  | -1.992857000 | -0.222411000 | -0.197321000 |
| 7  | 0.098750000  | -0.169223000 | -2.072947000 |
| 6  | -1.277042000 | -0.155098000 | 2.690226000  |
| 6  | 2.879761000  | 0.028790000  | -1.020138000 |
| 6  | 0.915712000  | 0.069984000  | 2.810066000  |
| 6  | 2.746583000  | 0.164655000  | 1.175914000  |
| 6  | -2.901953000 | -0.285517000 | 0.853905000  |
| 6  | 1.258242000  | -0.166051000 | -2.854118000 |
| 6  | -2.781343000 | -0.282252000 | -1.355789000 |
| 6  | -0.943903000 | -0.244680000 | -2.982517000 |
| 6  | -0.935918000 | -0.107976000 | 4.090391000  |
| 6  | 4.226690000  | 0.146674000  | -0.527511000 |
| 6  | 0.419964000  | 0.039646000  | 4.164421000  |
| 6  | 4.144077000  | 0.233739000  | 0.836922000  |
| 6  | -4.252340000 | -0.390067000 | 0.354345000  |



|   |              |              |              |
|---|--------------|--------------|--------------|
| 6 | 0.920238000  | -0.255593000 | -4.253070000 |
| 6 | -4.177925000 | -0.380795000 | -1.008129000 |
| 6 | -0.443268000 | -0.302417000 | -4.332772000 |
| 1 | -1.647647000 | -0.178315000 | 4.899185000  |
| 1 | 5.111219000  | 0.157900000  | -1.146460000 |
| 1 | 1.038682000  | 0.111197000  | 5.046364000  |
| 1 | 4.947941000  | 0.330210000  | 1.551275000  |
| 1 | -5.131286000 | -0.470142000 | 0.976387000  |
| 1 | 1.639608000  | -0.280706000 | -5.057869000 |
| 1 | -4.983513000 | -0.452963000 | -1.723467000 |
| 1 | -1.060688000 | -0.374990000 | -5.215438000 |
| 6 | -2.566883000 | -0.258855000 | 2.199743000  |
| 6 | 2.546258000  | -0.073844000 | -2.366696000 |
| 6 | -2.293708000 | -0.282003000 | -2.645077000 |
| 6 | 2.253912000  | 0.190750000  | 2.470886000  |
| 1 | -3.375593000 | -0.325557000 | 2.919181000  |
| 1 | 3.358594000  | -0.077914000 | -3.085029000 |
| 1 | -3.011443000 | -0.338379000 | -3.456078000 |
| 1 | 2.969518000  | 0.291698000  | 3.279408000  |
| 8 | -0.184242000 | 1.862252000  | -0.135840000 |
| 6 | -1.254771000 | 3.428690000  | -0.338931000 |
| 1 | -1.517086000 | 3.227531000  | -1.372086000 |
| 6 | -2.232724000 | 3.379815000  | 0.647350000  |
| 1 | -3.206696000 | 2.940259000  | 0.459149000  |
| 1 | -2.035859000 | 3.741375000  | 1.651077000  |
| 1 | -0.375952000 | 4.046943000  | -0.188070000 |

<sup>4</sup>TS<sub>2</sub>:

|    |              |              |              |
|----|--------------|--------------|--------------|
| 26 | 0.079393000  | 0.141467000  | -0.089991000 |
| 7  | -0.020245000 | -0.140770000 | 1.898375000  |
| 7  | 2.089780000  | 0.025457000  | 0.037170000  |
| 7  | -1.870891000 | -0.328840000 | -0.211779000 |
| 7  | 0.234593000  | -0.168728000 | -2.078330000 |
| 6  | -1.169594000 | -0.250484000 | 2.677447000  |
| 6  | 3.001090000  | 0.099176000  | -1.011748000 |
| 6  | 1.027097000  | -0.047487000 | 2.815473000  |
| 6  | 2.860968000  | 0.102482000  | 1.190125000  |
| 6  | -2.784495000 | -0.412985000 | 0.835994000  |
| 6  | 1.386257000  | -0.072288000 | -2.853426000 |
| 6  | -2.643403000 | -0.425161000 | -1.370032000 |
| 6  | -0.805720000 | -0.283434000 | -2.991931000 |
| 6  | -0.834415000 | -0.235136000 | 4.080319000  |
| 6  | 4.346064000  | 0.209228000  | -0.505681000 |
| 6  | 0.522577000  | -0.109346000 | 4.165467000  |
| 6  | 4.259162000  | 0.210494000  | 0.859188000  |
| 6  | -4.125350000 | -0.569042000 | 0.327993000  |
| 6  | 1.058957000  | -0.141699000 | -4.255196000 |
| 6  | -4.038043000 | -0.576389000 | -1.034811000 |
| 6  | -0.299648000 | -0.273548000 | -4.341039000 |
| 1  | -1.551232000 | -0.319513000 | 4.883384000  |
| 1  | 5.231646000  | 0.269760000  | -1.120405000 |
| 1  | 1.137192000  | -0.070237000 | 5.052350000  |
| 1  | 5.059372000  | 0.272405000  | 1.581407000  |
| 1  | -5.006987000 | -0.669033000 | 0.943249000  |
| 1  | 1.780102000  | -0.101517000 | -5.057814000 |
| 1  | -4.834107000 | -0.683460000 | -1.756420000 |
| 1  | -0.909272000 | -0.362211000 | -5.227745000 |
| 6  | -2.457207000 | -0.369945000 | 2.181362000  |
| 6  | 2.673314000  | 0.058756000  | -2.357306000 |
| 6  | -2.148366000 | -0.398474000 | -2.661011000 |
| 6  | 2.364739000  | 0.072242000  | 2.485533000  |
| 1  | -3.266843000 | -0.450809000 | 2.898295000  |
| 1  | 3.484541000  | 0.121185000  | -3.074252000 |
| 1  | -2.860064000 | -0.486518000 | -3.474495000 |
| 1  | 3.079480000  | 0.135377000  | 3.298635000  |
| 8  | -0.081084000 | 1.799902000  | -0.095725000 |
| 6  | -1.097624000 | 3.494071000  | 0.527329000  |
| 1  | -1.019679000 | 3.231048000  | 1.575131000  |
| 1  | -2.014266000 | 3.214243000  | 0.019769000  |
| 6  | -0.219384000 | 4.390826000  | -0.047355000 |
| 1  | 0.641852000  | 4.715949000  | 0.533941000  |

|   |              |             |              |
|---|--------------|-------------|--------------|
| 6 | -0.331197000 | 4.909881000 | -1.437290000 |
| 1 | 0.548924000  | 4.617145000 | -2.028484000 |
| 1 | -1.227165000 | 4.546005000 | -1.947176000 |
| 1 | -0.344776000 | 6.009444000 | -1.443167000 |

<sup>4</sup>TS<sub>3</sub>:

|    |              |              |              |
|----|--------------|--------------|--------------|
| 26 | 0.047540000  | 0.107268000  | -0.131326000 |
| 7  | 0.018477000  | 0.165280000  | 1.885329000  |
| 7  | 2.063467000  | 0.185087000  | -0.057716000 |
| 7  | -1.853789000 | -0.544173000 | -0.096050000 |
| 7  | 0.185715000  | -0.526938000 | -2.035126000 |
| 6  | -1.098962000 | 0.103199000  | 2.708899000  |
| 6  | 2.942699000  | 0.142383000  | -1.132673000 |
| 6  | 1.068878000  | 0.515315000  | 2.728640000  |
| 6  | 2.848239000  | 0.532819000  | 1.036861000  |
| 6  | -2.733184000 | -0.519329000 | 0.986406000  |
| 6  | 1.311431000  | -0.481691000 | -2.857808000 |
| 6  | -2.639854000 | -0.906951000 | -1.187884000 |
| 6  | -0.860217000 | -0.890756000 | -2.878482000 |
| 6  | -0.741222000 | 0.401599000  | 4.072851000  |
| 6  | 4.283253000  | 0.451035000  | -0.703747000 |
| 6  | 0.601780000  | 0.657284000  | 4.085067000  |
| 6  | 4.224632000  | 0.693454000  | 0.641093000  |
| 6  | -4.065200000 | -0.875982000 | 0.562995000  |
| 6  | 0.959788000  | -0.828014000 | -4.212930000 |
| 6  | -4.007641000 | -1.115415000 | -0.780094000 |
| 6  | -0.382390000 | -1.080919000 | -4.225875000 |
| 1  | -1.431694000 | 0.405705000  | 4.902913000  |
| 1  | 5.147376000  | 0.470182000  | -1.350824000 |
| 1  | 1.227677000  | 0.911736000  | 4.927277000  |
| 1  | 5.031390000  | 0.949890000  | 1.311316000  |
| 1  | -4.920587000 | -0.940341000 | 1.218757000  |
| 1  | 1.658531000  | -0.876964000 | -5.034670000 |
| 1  | -4.806298000 | -1.414790000 | -1.442193000 |
| 1  | -1.000314000 | -1.377841000 | -5.060055000 |
| 6  | -2.382734000 | -0.211764000 | 2.288675000  |
| 6  | 2.590911000  | -0.164464000 | -2.439106000 |
| 6  | -2.177566000 | -1.061209000 | -2.483766000 |
| 6  | 2.384495000  | 0.691656000  | 2.333016000  |
| 1  | -3.166136000 | -0.230815000 | 3.038247000  |
| 1  | 3.379150000  | -0.167867000 | -3.183842000 |
| 1  | -2.895875000 | -1.351383000 | -3.242656000 |
| 1  | 3.106672000  | 0.961658000  | 3.095598000  |
| 8  | -0.263586000 | 1.714107000  | -0.437279000 |
| 6  | -1.314693000 | 3.214426000  | -1.407215000 |
| 1  | -2.280526000 | 2.816001000  | -1.120239000 |
| 1  | -0.940488000 | 2.932145000  | -2.385494000 |
| 6  | -0.731531000 | 4.247607000  | -0.700299000 |
| 1  | -1.196324000 | 4.566175000  | 0.232343000  |
| 6  | 0.529585000  | 4.941925000  | -1.090277000 |
| 1  | 1.301448000  | 4.699278000  | -0.340920000 |
| 1  | 0.893781000  | 4.561803000  | -2.051962000 |
| 6  | 0.372983000  | 6.482888000  | -1.142268000 |
| 1  | 0.036515000  | 6.880625000  | -0.178346000 |
| 1  | 1.332479000  | 6.949872000  | -1.383984000 |
| 1  | -0.353112000 | 6.779409000  | -1.905828000 |

<sup>4</sup>TS<sub>4</sub>:

|    |              |              |              |
|----|--------------|--------------|--------------|
| 26 | 0.228686000  | 0.233661000  | 0.043661000  |
| 7  | 0.207363000  | -0.174032000 | 2.008871000  |
| 7  | 2.210163000  | -0.072622000 | 0.042159000  |
| 7  | -1.755438000 | 0.009647000  | 0.012147000  |
| 7  | 0.242766000  | 0.100384000  | -1.951167000 |
| 6  | -0.896700000 | -0.233956000 | 2.843135000  |
| 6  | 3.066928000  | -0.032182000 | -1.056085000 |
| 6  | 1.308539000  | -0.219666000 | 2.864922000  |
| 6  | 3.046030000  | -0.121478000 | 1.147814000  |
| 6  | -2.617532000 | -0.084378000 | 1.115486000  |
| 6  | 1.349091000  | 0.107873000  | -2.790029000 |
| 6  | -2.592166000 | 0.123727000  | -1.083893000 |
| 6  | -0.859051000 | 0.198629000  | -2.809850000 |

|   |              |              |              |
|---|--------------|--------------|--------------|
| 6 | -0.492698000 | -0.338591000 | 4.222894000  |
| 6 | 4.442155000  | -0.075784000 | -0.623445000 |
| 6 | 0.873043000  | -0.326321000 | 4.237980000  |
| 6 | 4.428265000  | -0.126578000 | 0.742778000  |
| 6 | -3.994242000 | -0.046805000 | 0.677256000  |
| 6 | 0.941244000  | 0.200784000  | -4.169943000 |
| 6 | -3.977354000 | 0.082961000  | -0.681726000 |
| 6 | -0.422888000 | 0.260593000  | -4.182545000 |
| 1 | -1.176002000 | -0.412738000 | 5.055868000  |
| 1 | 5.292781000  | -0.067977000 | -1.289047000 |
| 1 | 1.538828000  | -0.388017000 | 5.086252000  |
| 1 | 5.264821000  | -0.171968000 | 1.424278000  |
| 1 | -4.845669000 | -0.124055000 | 1.337447000  |
| 1 | 1.623406000  | 0.210642000  | -5.007307000 |
| 1 | -4.812995000 | 0.135424000  | -1.364135000 |
| 1 | -1.086914000 | 0.325574000  | -5.032010000 |
| 6 | -2.222663000 | -0.196430000 | 2.425653000  |
| 6 | 2.669626000  | 0.047125000  | -2.373982000 |
| 6 | -2.173355000 | 0.231119000  | -2.406600000 |
| 6 | 2.626345000  | -0.183151000 | 2.470464000  |
| 1 | -2.992425000 | -0.260224000 | 3.186169000  |
| 1 | 3.440142000  | 0.065022000  | -3.136304000 |
| 1 | -2.938200000 | 0.309308000  | -3.171277000 |
| 1 | 3.388922000  | -0.222014000 | 3.239828000  |
| 8 | 0.244418000  | 1.884911000  | 0.131954000  |
| 6 | -2.060289000 | 3.290801000  | -1.030806000 |
| 1 | -2.489809000 | 2.981647000  | -1.982044000 |
| 6 | -0.687965000 | 3.481359000  | -0.954919000 |
| 1 | -0.302026000 | 3.994793000  | -0.077941000 |
| 6 | -2.971524000 | 3.450173000  | 0.133583000  |
| 1 | -3.839066000 | 4.076162000  | -0.120206000 |
| 1 | -3.380235000 | 2.472192000  | 0.437529000  |
| 1 | -2.452884000 | 3.883558000  | 0.995052000  |
| 6 | 0.203946000  | 3.417729000  | -2.156323000 |
| 1 | 0.286281000  | 4.421210000  | -2.604073000 |
| 1 | 1.210396000  | 3.099759000  | -1.872990000 |
| 1 | -0.187486000 | 2.737800000  | -2.918836000 |

<sup>4</sup>TS<sub>5</sub>:

|    |              |              |              |
|----|--------------|--------------|--------------|
| 26 | -0.095086000 | 0.025326000  | -0.228363000 |
| 7  | -0.082866000 | 0.035401000  | 1.785268000  |
| 7  | 1.922964000  | -0.009033000 | -0.198591000 |
| 7  | -2.034686000 | -0.498570000 | -0.174724000 |
| 7  | -0.032441000 | -0.554312000 | -2.158156000 |
| 6  | -1.195540000 | 0.035281000  | 2.628656000  |
| 6  | 2.772812000  | -0.055497000 | -1.290515000 |
| 6  | 1.000704000  | 0.266297000  | 2.618674000  |
| 6  | 2.752603000  | 0.232324000  | 0.898113000  |
| 6  | -2.889187000 | -0.430102000 | 0.913043000  |
| 6  | 1.080823000  | -0.533896000 | -3.005032000 |
| 6  | -2.860267000 | -0.795064000 | -1.265901000 |
| 6  | -1.105668000 | -0.840121000 | -2.982893000 |
| 6  | -0.789338000 | 0.257643000  | 3.995364000  |
| 6  | 4.140025000  | 0.149312000  | -0.882199000 |
| 6  | 0.569527000  | 0.398064000  | 3.989290000  |
| 6  | 4.128283000  | 0.325317000  | 0.473816000  |
| 6  | -4.251007000 | -0.692516000 | 0.510388000  |
| 6  | 0.681594000  | -0.821948000 | -4.362038000 |
| 6  | -4.232738000 | -0.919901000 | -0.835231000 |
| 6  | -0.670829000 | -1.013586000 | -4.347708000 |
| 1  | -1.462487000 | 0.289129000  | 4.839029000  |
| 1  | 4.988605000  | 0.146289000  | -1.549757000 |
| 1  | 1.229301000  | 0.567772000  | 4.826983000  |
| 1  | 4.965215000  | 0.496095000  | 1.134343000  |
| 1  | -5.096939000 | -0.708585000 | 1.181205000  |
| 1  | 1.357183000  | -0.876191000 | -5.202598000 |
| 1  | -5.060520000 | -1.157849000 | -1.486384000 |
| 1  | -1.322261000 | -1.255465000 | -5.174041000 |
| 6  | -2.498676000 | -0.168876000 | 2.222177000  |
| 6  | 2.377538000  | -0.292536000 | -2.605449000 |
| 6  | -2.430401000 | -0.951143000 | -2.565380000 |

|   |              |              |              |
|---|--------------|--------------|--------------|
| 6 | 2.325215000  | 0.358982000  | 2.204778000  |
| 1 | -3.273177000 | -0.146767000 | 2.980861000  |
| 1 | 3.151046000  | -0.306283000 | -3.365300000 |
| 1 | -3.174522000 | -1.183478000 | -3.319171000 |
| 1 | 3.076195000  | 0.539786000  | 2.965911000  |
| 8 | -0.307058000 | 1.637158000  | -0.472351000 |
| 6 | -0.681154000 | 3.745909000  | -0.944084000 |
| 1 | -0.798295000 | 3.242079000  | -1.895867000 |
| 6 | -1.812299000 | 4.191239000  | -0.292766000 |
| 1 | -2.788682000 | 3.904244000  | -0.678081000 |
| 6 | -1.779791000 | 5.040277000  | 0.938848000  |
| 1 | -2.197926000 | 6.031981000  | 0.687544000  |
| 1 | -2.475479000 | 4.629966000  | 1.686932000  |
| 6 | 0.659583000  | 5.442402000  | 0.398419000  |
| 1 | 1.659550000  | 5.608898000  | 0.814106000  |
| 1 | 0.387991000  | 6.357654000  | -0.145988000 |
| 6 | -0.362267000 | 5.198115000  | 1.523568000  |
| 1 | -0.347427000 | 6.021237000  | 2.246106000  |
| 1 | -0.089985000 | 4.285046000  | 2.071426000  |
| 6 | 0.696037000  | 4.247455000  | -0.579902000 |
| 1 | 1.263849000  | 3.417920000  | -0.136926000 |
| 1 | 1.231493000  | 4.517687000  | -1.500278000 |

<sup>4</sup>TS<sub>6</sub>:

|    |              |              |              |
|----|--------------|--------------|--------------|
| 26 | 0.099785000  | 0.155879000  | -0.077344000 |
| 7  | 0.090790000  | -0.035788000 | 1.921703000  |
| 7  | 2.056810000  | -0.248752000 | -0.065219000 |
| 7  | -1.892432000 | -0.007968000 | -0.057824000 |
| 7  | 0.069065000  | -0.249628000 | -2.042772000 |
| 6  | -1.006839000 | 0.096045000  | 2.773574000  |
| 6  | 2.903002000  | -0.327559000 | -1.174588000 |
| 6  | 1.198085000  | -0.076483000 | 2.768506000  |
| 6  | 2.911675000  | -0.248741000 | 1.038403000  |
| 6  | -2.738089000 | 0.118240000  | 1.051286000  |
| 6  | 1.171162000  | -0.346952000 | -2.895977000 |
| 6  | -2.754153000 | -0.076845000 | -1.159124000 |
| 6  | -1.042716000 | -0.288926000 | -2.888557000 |
| 6  | -0.577621000 | 0.116347000  | 4.150011000  |
| 6  | 4.278608000  | -0.389406000 | -0.753613000 |
| 6  | 0.782309000  | 0.007272000  | 4.147051000  |
| 6  | 4.283964000  | -0.343702000 | 0.611526000  |
| 6  | -4.114424000 | 0.134119000  | 0.633128000  |
| 6  | 0.739109000  | -0.454418000 | -4.266115000 |
| 6  | -4.125072000 | 0.009077000  | -0.728774000 |
| 6  | -0.625992000 | -0.423231000 | -4.261492000 |
| 1  | -1.242469000 | 0.195861000  | 4.997059000  |
| 1  | 5.120768000  | -0.465774000 | -1.424976000 |
| 1  | 1.455425000  | -0.018134000 | 4.990874000  |
| 1  | 5.131411000  | -0.374027000 | 1.279880000  |
| 1  | -4.957023000 | 0.207358000  | 1.304647000  |
| 1  | 1.404277000  | -0.553596000 | -5.110843000 |
| 1  | -4.977904000 | -0.038515000 | -1.389699000 |
| 1  | -1.300842000 | -0.490881000 | -5.101739000 |
| 6  | -2.324219000 | 0.178000000  | 2.368652000  |
| 6  | 2.491942000  | -0.368159000 | -2.492312000 |
| 6  | -2.358703000 | -0.210782000 | -2.476459000 |
| 6  | 2.512839000  | -0.175671000 | 2.358865000  |
| 1  | -3.085785000 | 0.266000000  | 3.135207000  |
| 1  | 3.254776000  | -0.444513000 | -3.258612000 |
| 1  | -3.131734000 | -0.264295000 | -3.234652000 |
| 1  | 3.281956000  | -0.196474000 | 3.122264000  |
| 8  | 0.292455000  | 1.866164000  | -0.150339000 |
| 6  | -0.717860000 | 3.378642000  | -1.008143000 |
| 1  | -0.560551000 | 2.897016000  | -1.967485000 |
| 6  | -2.044602000 | 3.476517000  | -0.541635000 |
| 1  | -2.819473000 | 2.875870000  | -1.009518000 |
| 6  | -2.417828000 | 4.304088000  | 0.636501000  |
| 1  | -3.285650000 | 4.937546000  | 0.375952000  |
| 1  | -2.824094000 | 3.629708000  | 1.416038000  |
| 6  | -0.083035000 | 5.197585000  | 0.631530000  |
| 1  | 0.689437000  | 5.831422000  | 1.057191000  |

|   |              |             |              |
|---|--------------|-------------|--------------|
| 6 | -1.296520000 | 5.139453000 | 1.196929000  |
| 1 | -1.518675000 | 5.716896000 | 2.089284000  |
| 6 | 0.285995000  | 4.431800000 | -0.612363000 |
| 1 | 1.270050000  | 3.958790000 | -0.506634000 |
| 1 | 0.396044000  | 5.129628000 | -1.463651000 |

<sup>4</sup>TS<sub>2</sub>:

|    |              |              |              |
|----|--------------|--------------|--------------|
| 26 | 0.236500000  | -0.184862000 | 0.000641000  |
| 7  | -0.741483000 | -0.887138000 | 1.608795000  |
| 7  | 0.177607000  | -2.035009000 | -0.790574000 |
| 7  | -0.253644000 | 1.683564000  | 0.571896000  |
| 7  | 0.671858000  | 0.537254000  | -1.829204000 |
| 6  | -1.182956000 | -0.157902000 | 2.712259000  |
| 6  | 0.646127000  | -2.429250000 | -2.042325000 |
| 6  | -0.930202000 | -2.223233000 | 1.961211000  |
| 6  | -0.127294000 | -3.220723000 | -0.129181000 |
| 6  | -0.755452000 | 2.079929000  | 1.807363000  |
| 6  | 1.077169000  | -0.190233000 | -2.943639000 |
| 6  | 0.054432000  | 2.869887000  | -0.090345000 |
| 6  | 0.860219000  | 1.870037000  | -2.178967000 |
| 6  | -1.654303000 | -1.045509000 | 3.747251000  |
| 6  | 0.619645000  | -3.866326000 | -2.159726000 |
| 6  | -1.498115000 | -2.320203000 | 3.283720000  |
| 6  | 0.143136000  | -4.355786000 | -0.976471000 |
| 6  | -0.773378000 | 3.518846000  | 1.907930000  |
| 6  | 1.504874000  | 0.696416000  | -3.996609000 |
| 6  | -0.272276000 | 4.007164000  | 0.734941000  |
| 6  | 1.373221000  | 1.971821000  | -3.522151000 |
| 1  | -2.059272000 | -0.721718000 | 4.694435000  |
| 1  | 0.919077000  | -4.415610000 | -3.039901000 |
| 1  | -1.749768000 | -3.247748000 | 3.775986000  |
| 1  | -0.024990000 | -5.384825000 | -0.695800000 |
| 1  | -1.132750000 | 4.069473000  | 2.764460000  |
| 1  | 1.851074000  | 0.375016000  | -4.967575000 |
| 1  | -0.139866000 | 5.037407000  | 0.439876000  |
| 1  | 1.589778000  | 2.900865000  | -4.028053000 |
| 6  | -1.184818000 | 1.222235000  | 2.806412000  |
| 6  | 1.068161000  | -1.571810000 | -3.042570000 |
| 6  | 0.580650000  | 2.957027000  | -1.366557000 |
| 6  | -0.636203000 | -3.308711000 | 1.156328000  |
| 1  | -1.559826000 | 1.664076000  | 3.722920000  |
| 1  | 1.405372000  | -2.012005000 | -3.974415000 |
| 1  | 0.771266000  | 3.946707000  | -1.766516000 |
| 1  | -0.835795000 | -4.298254000 | 1.552254000  |
| 8  | 1.760269000  | -0.234461000 | 0.629232000  |
| 6  | 3.309630000  | -0.795116000 | 2.066954000  |
| 1  | 3.383151000  | -1.762512000 | 1.586816000  |
| 1  | 2.578571000  | -0.709441000 | 2.859719000  |
| 6  | 4.238989000  | 0.205713000  | 1.867721000  |
| 1  | 4.138870000  | 1.108394000  | 2.466166000  |
| 6  | 5.335979000  | 0.189039000  | 0.937886000  |
| 6  | 5.568698000  | -0.881908000 | 0.027835000  |
| 6  | 6.656865000  | -0.850327000 | -0.834198000 |
| 6  | 7.543080000  | 0.242968000  | -0.817697000 |
| 6  | 7.328992000  | 1.312751000  | 0.067804000  |
| 6  | 6.240470000  | 1.288587000  | 0.931399000  |
| 1  | 4.886696000  | -1.723685000 | -0.000635000 |
| 1  | 6.826629000  | -1.670931000 | -1.522336000 |
| 1  | 8.393653000  | 0.259114000  | -1.490558000 |
| 1  | 8.013159000  | 2.153669000  | 0.077818000  |
| 1  | 6.072571000  | 2.111204000  | 1.619440000  |

<sup>4</sup>TS<sub>3</sub>:

|    |              |             |              |
|----|--------------|-------------|--------------|
| 26 | 0.018578000  | 1.709090000 | 0.226303000  |
| 7  | -0.610557000 | 1.343118000 | 2.085493000  |
| 7  | 1.907008000  | 1.689746000 | 0.883430000  |
| 7  | -1.812382000 | 1.269642000 | -0.454751000 |
| 7  | 0.692539000  | 1.705142000 | -1.651319000 |
| 6  | -1.930909000 | 1.162045000 | 2.511573000  |
| 6  | 3.062638000  | 1.901555000 | 0.127085000  |
| 6  | 0.157841000  | 1.321572000 | 3.254331000  |

|   |              |             |              |
|---|--------------|-------------|--------------|
| 6 | 2.343935000  | 1.615074000 | 2.208403000  |
| 6 | -2.973415000 | 1.083390000 | 0.304170000  |
| 6 | 2.008471000  | 1.923263000 | -2.074755000 |
| 6 | -2.229519000 | 1.186533000 | -1.788075000 |
| 6 | -0.055427000 | 1.584341000 | -2.827930000 |
| 6 | -1.976859000 | 1.046532000 | 3.944703000  |
| 6 | 4.216437000  | 1.946988000 | 0.986926000  |
| 6 | -0.690715000 | 1.139272000 | 4.401050000  |
| 6 | 3.774461000  | 1.765303000 | 2.267763000  |
| 6 | -4.105233000 | 0.887934000 | -0.562209000 |
| 6 | 2.066137000  | 1.960636000 | -3.511247000 |
| 6 | -3.646456000 | 0.944616000 | -1.849453000 |
| 6 | 0.797133000  | 1.745801000 | -3.974893000 |
| 1 | -2.880050000 | 0.896322000 | 4.517231000  |
| 1 | 5.229756000  | 2.091244000 | 0.642895000  |
| 1 | -0.337091000 | 1.083647000 | 5.419750000  |
| 1 | 4.354867000  | 1.733754000 | 3.177745000  |
| 1 | -5.114902000 | 0.716607000 | -0.219727000 |
| 1 | 2.969283000  | 2.113941000 | -4.082920000 |
| 1 | -4.208140000 | 0.831608000 | -2.764780000 |
| 1 | 0.460430000  | 1.691131000 | -4.999433000 |
| 6 | -3.034568000 | 1.059633000 | 1.685096000  |
| 6 | 3.110414000  | 2.032837000 | -1.247828000 |
| 6 | -1.414264000 | 1.338097000 | -2.894386000 |
| 6 | 1.532739000  | 1.445221000 | 3.314024000  |
| 1 | -4.002895000 | 0.908886000 | 2.147768000  |
| 1 | 4.077135000  | 2.195890000 | -1.709461000 |
| 1 | -1.867924000 | 1.254651000 | -3.874990000 |
| 1 | 2.003979000  | 1.407312000 | 4.288943000  |
| 8 | -0.185553000 | 3.791294000 | 0.396457000  |
| 6 | -1.635064000 | 5.068033000 | -1.340782000 |
| 6 | -0.643708000 | 5.113641000 | -0.201829000 |
| 6 | -1.014363000 | 4.788005000 | 1.205115000  |
| 1 | -2.028299000 | 4.423228000 | 1.352266000  |
| 1 | 0.214915000  | 5.768014000 | -0.326503000 |
| 1 | -1.326821000 | 5.737659000 | -2.147848000 |
| 1 | -2.635073000 | 5.369616000 | -1.011398000 |
| 1 | -1.707450000 | 4.057043000 | -1.751137000 |
| 6 | -0.371120000 | 5.382202000 | 2.398520000  |
| 6 | -1.168995000 | 5.689754000 | 3.514183000  |
| 6 | -0.604859000 | 6.296084000 | 4.640636000  |
| 6 | 0.763956000  | 6.585548000 | 4.667057000  |
| 6 | 1.568108000  | 6.266061000 | 3.564166000  |
| 6 | 1.005699000  | 5.669642000 | 2.433787000  |
| 1 | 1.634826000  | 5.406706000 | 1.589604000  |
| 1 | 2.630499000  | 6.484335000 | 3.586292000  |
| 1 | 1.202937000  | 7.055065000 | 5.540841000  |
| 1 | -1.229966000 | 6.538909000 | 5.493036000  |
| 1 | -2.231379000 | 5.463289000 | 3.497349000  |

<sup>4</sup>TS<sub>4</sub>:

|    |              |              |              |
|----|--------------|--------------|--------------|
| 26 | 0.213038000  | 0.048391000  | -0.073393000 |
| 7  | 0.103017000  | 0.076869000  | 1.939440000  |
| 7  | 2.204491000  | -0.189547000 | 0.083507000  |
| 7  | -1.771163000 | -0.310364000 | -0.129753000 |
| 7  | 0.334892000  | -0.576549000 | -1.984732000 |
| 6  | -1.049228000 | 0.195603000  | 2.712206000  |
| 6  | 3.116195000  | -0.339809000 | -0.960981000 |
| 6  | 1.157077000  | 0.215969000  | 2.838741000  |
| 6  | 2.988701000  | -0.018832000 | 1.223768000  |
| 6  | -2.680802000 | -0.138408000 | 0.910381000  |
| 6  | 1.484798000  | -0.674970000 | -2.761853000 |
| 6  | -2.550952000 | -0.535689000 | -1.258468000 |
| 6  | -0.720434000 | -0.771803000 | -2.875155000 |
| 6  | -0.708236000 | 0.401208000  | 4.097928000  |
| 6  | 4.468560000  | -0.269131000 | -0.464154000 |
| 6  | 0.656216000  | 0.411044000  | 4.176743000  |
| 6  | 4.389821000  | -0.073862000 | 0.885105000  |
| 6  | -4.031905000 | -0.270932000 | 0.425199000  |
| 6  | 1.144314000  | -0.944754000 | -4.137620000 |
| 6  | -3.951472000 | -0.518994000 | -0.916848000 |

|   |              |              |              |
|---|--------------|--------------|--------------|
| 6 | -0.218199000 | -1.006678000 | -4.207153000 |
| 1 | -1.426070000 | 0.509686000  | 4.897234000  |
| 1 | 5.352571000  | -0.370450000 | -1.075856000 |
| 1 | 1.275735000  | 0.530066000  | 5.053078000  |
| 1 | 5.196599000  | 0.017305000  | 1.596991000  |
| 1 | -4.916007000 | -0.193017000 | 1.040178000  |
| 1 | 1.862681000  | -1.078148000 | -4.932641000 |
| 1 | -4.756692000 | -0.683835000 | -1.617111000 |
| 1 | -0.836916000 | -1.200143000 | -5.070692000 |
| 6 | -2.345020000 | 0.104826000  | 2.231288000  |
| 6 | 2.780335000  | -0.554704000 | -2.285802000 |
| 6 | -2.061111000 | -0.751410000 | -2.537732000 |
| 6 | 2.500739000  | 0.169697000  | 2.504960000  |
| 1 | -3.154747000 | 0.213052000  | 2.944426000  |
| 1 | 3.590130000  | -0.659356000 | -2.999394000 |
| 1 | -2.782010000 | -0.922686000 | -3.329518000 |
| 1 | 3.222266000  | 0.282637000  | 3.306621000  |
| 8 | 0.181806000  | 1.694823000  | -0.358365000 |
| 6 | -0.001679000 | 3.897189000  | -1.416125000 |
| 1 | 0.319426000  | 3.595831000  | -2.410832000 |
| 6 | 0.913769000  | 3.728680000  | -0.382513000 |
| 1 | 1.910306000  | 3.395528000  | -0.658677000 |
| 6 | -1.389174000 | 4.418896000  | -1.304098000 |
| 1 | -1.520758000 | 5.293563000  | -1.957962000 |
| 1 | -2.103067000 | 3.664112000  | -1.663181000 |
| 1 | -1.669433000 | 4.702678000  | -0.288705000 |
| 6 | 0.734531000  | 4.158046000  | 1.035657000  |
| 1 | 1.198668000  | 3.433720000  | 1.711157000  |
| 1 | 1.241081000  | 5.121300000  | 1.201091000  |
| 1 | -0.313227000 | 4.273825000  | 1.318166000  |

<sup>4</sup>Ts<sub>10</sub>:

|    |              |              |              |
|----|--------------|--------------|--------------|
| 26 | 1.653062000  | 4.027115000  | -1.076666000 |
| 7  | 1.208600000  | 2.079370000  | -0.820475000 |
| 7  | 3.605118000  | 3.547461000  | -1.012361000 |
| 7  | -0.243995000 | 4.333820000  | -1.690118000 |
| 7  | 2.157314000  | 5.797895000  | -1.896558000 |
| 6  | -0.055451000 | 1.499025000  | -0.805538000 |
| 6  | 4.688740000  | 4.406489000  | -1.186319000 |
| 6  | 2.073776000  | 1.071683000  | -0.401322000 |
| 6  | 4.159422000  | 2.353841000  | -0.563670000 |
| 6  | -1.321938000 | 3.461587000  | -1.558070000 |
| 6  | 3.425415000  | 6.362270000  | -1.961114000 |
| 6  | -0.798994000 | 5.531928000  | -2.123887000 |
| 6  | 1.290365000  | 6.807319000  | -2.310444000 |
| 6  | 0.026101000  | 0.120439000  | -0.388657000 |
| 6  | 5.921766000  | 3.735720000  | -0.852478000 |
| 6  | 1.342561000  | -0.143274000 | -0.136640000 |
| 6  | 5.594367000  | 2.467428000  | -0.465825000 |
| 6  | -2.551390000 | 4.122216000  | -1.921431000 |
| 6  | 3.350526000  | 7.723930000  | -2.431260000 |
| 6  | -2.227993000 | 5.403935000  | -2.269725000 |
| 6  | 2.029768000  | 7.999745000  | -2.645841000 |
| 1  | -0.818134000 | -0.548181000 | -0.310311000 |
| 1  | 6.901626000  | 4.184721000  | -0.917496000 |
| 1  | 1.790004000  | -1.070614000 | 0.188542000  |
| 1  | 6.252984000  | 1.671439000  | -0.151947000 |
| 1  | -3.524600000 | 3.654345000  | -1.916983000 |
| 1  | 4.203014000  | 8.369489000  | -2.581142000 |
| 1  | -2.884192000 | 6.191995000  | -2.607967000 |
| 1  | 1.586670000  | 8.915768000  | -3.007233000 |
| 6  | -1.234231000 | 2.143264000  | -1.145834000 |
| 6  | 4.605338000  | 5.714999000  | -1.625932000 |
| 6  | -0.084563000 | 6.687644000  | -2.404870000 |
| 6  | 3.445303000  | 1.202740000  | -0.270882000 |
| 1  | -2.153342000 | 1.570184000  | -1.093345000 |
| 1  | 5.529991000  | 6.272949000  | -1.723969000 |
| 1  | -0.642853000 | 7.552658000  | -2.745696000 |
| 1  | 4.004053000  | 0.336610000  | 0.066024000  |
| 8  | 1.489572000  | 4.521385000  | 0.480403000  |
| 6  | 0.837693000  | 9.481293000  | 3.991842000  |

|   |              |              |             |
|---|--------------|--------------|-------------|
| 6 | 0.294962000  | 8.045647000  | 3.901074000 |
| 6 | 0.892874000  | 7.284275000  | 2.587405000 |
| 6 | 0.452497000  | 7.359697000  | 5.261848000 |
| 6 | -0.291140000 | 7.945827000  | 1.798058000 |
| 6 | -1.085696000 | 7.959852000  | 3.143576000 |
| 6 | -1.749593000 | 6.583652000  | 3.344571000 |
| 6 | -0.817942000 | 5.431220000  | 2.849854000 |
| 6 | 0.636447000  | 5.831422000  | 2.745697000 |
| 6 | 1.650593000  | 4.896117000  | 2.766965000 |
| 1 | 2.689011000  | 5.191885000  | 2.674629000 |
| 1 | 1.450139000  | 3.846814000  | 2.948588000 |
| 1 | -0.927757000 | 4.530741000  | 3.465167000 |
| 1 | -1.123444000 | 5.131176000  | 1.834617000 |
| 1 | -0.707279000 | 7.367162000  | 0.968856000 |
| 1 | -2.000014000 | 6.439652000  | 4.401618000 |
| 1 | -2.694656000 | 6.547262000  | 2.790914000 |
| 1 | -1.789665000 | 8.778433000  | 3.320956000 |
| 1 | -0.029297000 | 8.942391000  | 1.442306000 |
| 1 | -0.119657000 | 7.904872000  | 6.022826000 |
| 1 | 0.111974000  | 6.320843000  | 5.268921000 |
| 1 | 1.503595000  | 7.367080000  | 5.575104000 |
| 1 | 1.923168000  | 7.518645000  | 2.311075000 |
| 1 | 0.761890000  | 10.032803000 | 3.050903000 |
| 1 | 0.271974000  | 10.038987000 | 4.748762000 |
| 1 | 1.890011000  | 9.478115000  | 4.299165000 |

**UB3LYP/BS2 optimized geometries of epoxidation product complexes for the reaction of [Fe<sup>IV</sup>(O)(Por<sup>+</sup>)]<sup>+</sup> with substrates:**

<sup>4</sup>P<sub>1</sub>:

|    |              |              |              |
|----|--------------|--------------|--------------|
| 26 | -0.067740000 | 0.151886000  | 0.060909000  |
| 7  | -0.054528000 | -0.014707000 | 2.038142000  |
| 7  | 1.921014000  | 0.168785000  | 0.054540000  |
| 7  | -2.034597000 | -0.137921000 | 0.054616000  |
| 7  | -0.055685000 | -0.003909000 | -1.932264000 |
| 6  | -1.159406000 | -0.113774000 | 2.887985000  |
| 6  | 2.770010000  | 0.226434000  | -1.055880000 |
| 6  | 1.052246000  | 0.062949000  | 2.887769000  |
| 6  | 2.769499000  | 0.232490000  | 1.164493000  |
| 6  | -2.882232000 | -0.210975000 | 1.164748000  |
| 6  | 1.054809000  | 0.045612000  | -2.783997000 |
| 6  | -2.882266000 | -0.215550000 | -1.055690000 |
| 6  | -1.160123000 | -0.129678000 | -2.783982000 |
| 6  | -0.732950000 | -0.108671000 | 4.261225000  |
| 6  | 4.138517000  | 0.335307000  | -0.629769000 |
| 6  | 0.630579000  | 0.000776000  | 4.261108000  |
| 6  | 4.137967000  | 0.338332000  | 0.738835000  |
| 6  | -4.250178000 | -0.323418000 | 0.739290000  |
| 6  | 0.634347000  | -0.045031000 | -4.154602000 |
| 6  | -4.250552000 | -0.325521000 | -0.629335000 |
| 6  | -0.730543000 | -0.153369000 | -4.154580000 |
| 1  | -1.401659000 | -0.180028000 | 5.106343000  |
| 1  | 4.982608000  | 0.391665000  | -1.301384000 |
| 1  | 1.302258000  | 0.036885000  | 5.106120000  |
| 1  | 4.981408000  | 0.398908000  | 1.410778000  |
| 1  | -5.092325000 | -0.398477000 | 1.411388000  |
| 1  | 1.306778000  | -0.033697000 | -4.999863000 |
| 1  | -5.092970000 | -0.403898000 | -1.300830000 |
| 1  | -1.396398000 | -0.248221000 | -4.999795000 |
| 6  | -2.477449000 | -0.197183000 | 2.485044000  |
| 6  | 2.369643000  | 0.172677000  | -2.377401000 |
| 6  | -2.478623000 | -0.208620000 | -2.377250000 |
| 6  | 2.367147000  | 0.186470000  | 2.484820000  |
| 1  | -3.240268000 | -0.265408000 | 3.251455000  |
| 1  | 3.136163000  | 0.212966000  | -3.142257000 |
| 1  | -3.242159000 | -0.290367000 | -3.141794000 |
| 1  | 3.130947000  | 0.241045000  | 3.251347000  |
| 8  | -0.224748000 | 2.242459000  | 0.035010000  |
| 6  | -1.015359000 | 2.987626000  | -1.020969000 |
| 1  | -1.625849000 | 3.778131000  | -0.598391000 |
| 1  | -1.490089000 | 2.328503000  | -1.740282000 |

|   |             |             |              |
|---|-------------|-------------|--------------|
| 6 | 0.459245000 | 3.101928000 | -1.008521000 |
| 1 | 1.042766000 | 2.525260000 | -1.718647000 |
| 1 | 0.932872000 | 3.976666000 | -0.576390000 |

<sup>4</sup>P<sub>2</sub>:-

|    |              |              |              |
|----|--------------|--------------|--------------|
| 26 | -0.106443000 | 0.193080000  | 0.023100000  |
| 7  | -0.061761000 | -0.067075000 | 1.972031000  |
| 7  | 1.870592000  | 0.378281000  | -0.006229000 |
| 7  | -2.057006000 | -0.192443000 | 0.031641000  |
| 7  | -0.100493000 | 0.129450000  | -1.951223000 |
| 6  | -1.087016000 | -0.516957000 | 2.803305000  |
| 6  | 2.727632000  | 0.274855000  | -1.095269000 |
| 6  | 0.985851000  | 0.306774000  | 2.817076000  |
| 6  | 2.665703000  | 0.715299000  | 1.085010000  |
| 6  | -2.835468000 | -0.619330000 | 1.099990000  |
| 6  | 1.000926000  | 0.039237000  | -2.806949000 |
| 6  | -2.928216000 | -0.020427000 | -1.039867000 |
| 6  | -1.223633000 | 0.236658000  | -2.778991000 |
| 6  | -0.653741000 | -0.463142000 | 4.174463000  |
| 6  | 4.078685000  | 0.560553000  | -0.676391000 |
| 6  | 0.606993000  | 0.073250000  | 4.184676000  |
| 6  | 4.036130000  | 0.862899000  | 0.657019000  |
| 6  | -4.216109000 | -0.714950000 | 0.686213000  |
| 6  | 0.553080000  | 0.075200000  | -4.172657000 |
| 6  | -4.277493000 | -0.318234000 | -0.620043000 |
| 6  | -0.809292000 | 0.228124000  | -4.155113000 |
| 1  | -1.256443000 | -0.770907000 | 5.016251000  |
| 1  | 4.936768000  | 0.541014000  | -1.332147000 |
| 1  | 1.241023000  | 0.275405000  | 5.035406000  |
| 1  | 4.855062000  | 1.120304000  | 1.312579000  |
| 1  | -5.023345000 | -1.033077000 | 1.329423000  |
| 1  | 1.207155000  | 0.011863000  | -5.029927000 |
| 1  | -5.142275000 | -0.264311000 | -1.264883000 |
| 1  | -1.484585000 | 0.298301000  | -4.995237000 |
| 6  | -2.374318000 | -0.817751000 | 2.390173000  |
| 6  | 2.325836000  | 0.066346000  | -2.403597000 |
| 6  | -2.540874000 | 0.231207000  | -2.345484000 |
| 6  | 2.237402000  | 0.732483000  | 2.402237000  |
| 1  | -3.084741000 | -1.144112000 | 3.140267000  |
| 1  | 3.090896000  | 0.010155000  | -3.168737000 |
| 1  | -3.318140000 | 0.317233000  | -3.095798000 |
| 1  | 2.960764000  | 0.990986000  | 3.166630000  |
| 8  | -0.474788000 | 2.267579000  | 0.188132000  |
| 6  | -1.161865000 | 3.192903000  | -0.777679000 |
| 1  | -2.028165000 | 3.689968000  | -0.353512000 |
| 1  | -1.284615000 | 2.763696000  | -1.767960000 |
| 6  | 0.206859000  | 3.529427000  | -0.314957000 |
| 1  | 0.298041000  | 4.253222000  | 0.490828000  |
| 6  | 1.408914000  | 3.346345000  | -1.196093000 |
| 1  | 2.284579000  | 3.051307000  | -0.608886000 |
| 1  | 1.223327000  | 2.582594000  | -1.955747000 |
| 1  | 1.634650000  | 4.296209000  | -1.697746000 |

<sup>4</sup>P<sub>3</sub>:-

|    |              |              |              |
|----|--------------|--------------|--------------|
| 26 | -0.020864000 | 0.309358000  | 0.050850000  |
| 7  | -0.021844000 | 0.002196000  | 2.015812000  |
| 7  | 1.962932000  | 0.379477000  | 0.073768000  |
| 7  | -1.976304000 | -0.062453000 | 0.006550000  |
| 7  | 0.023019000  | 0.215493000  | -1.937925000 |
| 6  | -1.118126000 | -0.270121000 | 2.836166000  |
| 6  | 2.833667000  | 0.408293000  | -1.019771000 |
| 6  | 1.057034000  | 0.162544000  | 2.887493000  |
| 6  | 2.783588000  | 0.503262000  | 1.198673000  |
| 6  | -2.820744000 | -0.318609000 | 1.089890000  |
| 6  | 1.145140000  | 0.244844000  | -2.771545000 |
| 6  | -2.817264000 | -0.006603000 | -1.108622000 |
| 6  | -1.076469000 | 0.236943000  | -2.802606000 |
| 6  | -0.710504000 | -0.301346000 | 4.216010000  |
| 6  | 4.189474000  | 0.566882000  | -0.569167000 |

|   |              |              |              |
|---|--------------|--------------|--------------|
| 6 | 0.628032000  | -0.022349000 | 4.248502000  |
| 6 | 4.157095000  | 0.638913000  | 0.797606000  |
| 6 | -4.183714000 | -0.418611000 | 0.643097000  |
| 6 | 0.737901000  | 0.278928000  | -4.148905000 |
| 6 | -4.183501000 | -0.212529000 | -0.710156000 |
| 6 | -0.631408000 | 0.290936000  | -4.168062000 |
| 1 | -1.375699000 | -0.502575000 | 5.042812000  |
| 1 | 5.047585000  | 0.612107000  | -1.223668000 |
| 1 | 1.279740000  | 0.046458000  | 5.107062000  |
| 1 | 4.983683000  | 0.750798000  | 1.483807000  |
| 1 | -5.023707000 | -0.620379000 | 1.291448000  |
| 1 | 1.420845000  | 0.296933000  | -4.985591000 |
| 1 | -5.022706000 | -0.217522000 | -1.390265000 |
| 1 | -1.290665000 | 0.313113000  | -5.023472000 |
| 6 | -2.420984000 | -0.433881000 | 2.407406000  |
| 6 | 2.456999000  | 0.321534000  | -2.346110000 |
| 6 | -2.402442000 | 0.168667000  | -2.415496000 |
| 6 | 2.359209000  | 0.429125000  | 2.511680000  |
| 1 | -3.179936000 | -0.638897000 | 3.153071000  |
| 1 | 3.235832000  | 0.346077000  | -3.099075000 |
| 1 | -3.159775000 | 0.193786000  | -3.190229000 |
| 1 | 3.102267000  | 0.535993000  | 3.293027000  |
| 8 | -0.331923000 | 2.351731000  | 0.221697000  |
| 6 | -1.391112000 | 3.191508000  | -0.446938000 |
| 1 | -2.064331000 | 3.663255000  | 0.261147000  |
| 1 | -1.848977000 | 2.697315000  | -1.299833000 |
| 6 | 0.025438000  | 3.616067000  | -0.552922000 |
| 1 | 0.375355000  | 4.382555000  | 0.134792000  |
| 6 | 0.810538000  | 3.459691000  | -1.827041000 |
| 1 | 1.811583000  | 3.079066000  | -1.590362000 |
| 1 | 0.322820000  | 2.722485000  | -2.471314000 |
| 6 | 0.915232000  | 4.817984000  | -2.551951000 |
| 1 | 1.418204000  | 5.564412000  | -1.925119000 |
| 1 | 1.491937000  | 4.707713000  | -3.475872000 |
| 1 | -0.077181000 | 5.203632000  | -2.815011000 |

<sup>4</sup>P<sub>4</sub>:-

|    |              |              |              |
|----|--------------|--------------|--------------|
| 26 | -0.019668000 | 0.158169000  | -0.019994000 |
| 7  | 0.036529000  | -0.096300000 | 1.951764000  |
| 7  | 1.964686000  | 0.217481000  | -0.059125000 |
| 7  | -1.981866000 | -0.194055000 | -0.001823000 |
| 7  | -0.035066000 | 0.017513000  | -2.012671000 |
| 6  | -1.044588000 | -0.299317000 | 2.811462000  |
| 6  | 2.799629000  | 0.246581000  | -1.180450000 |
| 6  | 1.147004000  | 0.040923000  | 2.785832000  |
| 6  | 2.822224000  | 0.343920000  | 1.038529000  |
| 6  | -2.801746000 | -0.343679000 | 1.118136000  |
| 6  | 1.062900000  | 0.030204000  | -2.879507000 |
| 6  | -2.851566000 | -0.176400000 | -1.094572000 |
| 6  | -1.156931000 | -0.046631000 | -2.847094000 |
| 6  | -0.595319000 | -0.316853000 | 4.178557000  |
| 6  | 4.168349000  | 0.414329000  | -0.775095000 |
| 6  | 0.754919000  | -0.099354000 | 4.163208000  |
| 6  | 4.181303000  | 0.484579000  | 0.592018000  |
| 6  | -4.181345000 | -0.410207000 | 0.717485000  |
| 6  | 0.618315000  | -0.028628000 | -4.245111000 |
| 6  | -4.213023000 | -0.298703000 | -0.646645000 |
| 6  | -0.749871000 | -0.065629000 | -4.225534000 |
| 1  | -1.242261000 | -0.468413000 | 5.030064000  |
| 1  | 5.003893000  | 0.462977000  | -1.457942000 |
| 1  | 1.436028000  | -0.040028000 | 4.999372000  |
| 1  | 5.029803000  | 0.599034000  | 1.250516000  |
| 1  | -5.008889000 | -0.532108000 | 1.400861000  |
| 1  | 1.278005000  | -0.038585000 | -5.100364000 |
| 1  | -5.071330000 | -0.315941000 | -1.302301000 |
| 1  | -1.432343000 | -0.115628000 | -5.061322000 |
| 6  | -2.366425000 | -0.413708000 | 2.427665000  |
| 6  | 2.385036000  | 0.138631000  | -2.493524000 |
| 6  | -2.470854000 | -0.098129000 | -2.421009000 |
| 6  | 2.441781000  | 0.275755000  | 2.364871000  |
| 1  | -3.110391000 | -0.550142000 | 3.203594000  |

|   |              |              |              |
|---|--------------|--------------|--------------|
| 1 | 3.141781000  | 0.155092000  | -3.268855000 |
| 1 | -3.248975000 | -0.119630000 | -3.174936000 |
| 1 | 3.211962000  | 0.376215000  | 3.120397000  |
| 8 | -0.405152000 | 2.174989000  | 0.123593000  |
| 6 | -1.260248000 | 2.958305000  | -0.865289000 |
| 1 | -1.325155000 | 2.434759000  | -1.816802000 |
| 6 | 0.078789000  | 3.482278000  | -0.496673000 |
| 1 | 0.111361000  | 4.256298000  | 0.266907000  |
| 6 | -2.543244000 | 3.473751000  | -0.286271000 |
| 1 | -2.986741000 | 4.215197000  | -0.963015000 |
| 1 | -3.257226000 | 2.651761000  | -0.160216000 |
| 1 | -2.369027000 | 3.943991000  | 0.686685000  |
| 6 | 1.263892000  | 3.380275000  | -1.411189000 |
| 1 | 1.394675000  | 4.330431000  | -1.944620000 |
| 1 | 2.177556000  | 3.179908000  | -0.841165000 |
| 1 | 1.125437000  | 2.580325000  | -2.142707000 |

<sup>4</sup>P<sub>5</sub>:-

|    |              |              |              |
|----|--------------|--------------|--------------|
| 26 | -0.044483000 | 0.057668000  | 0.034777000  |
| 7  | -0.170289000 | -0.073875000 | 2.019722000  |
| 7  | 1.921134000  | -0.017024000 | 0.162487000  |
| 7  | -2.009163000 | -0.185213000 | -0.106343000 |
| 7  | 0.076563000  | 0.034098000  | -1.959948000 |
| 6  | -1.327673000 | 0.049876000  | 2.782883000  |
| 6  | 2.822770000  | 0.257972000  | -0.869537000 |
| 6  | 0.869431000  | -0.254291000 | 2.924715000  |
| 6  | 2.697878000  | -0.218405000 | 1.305109000  |
| 6  | -2.933371000 | -0.084777000 | 0.939915000  |
| 6  | 1.211664000  | 0.324103000  | -2.709545000 |
| 6  | -2.765152000 | -0.414808000 | -1.260903000 |
| 6  | -0.943939000 | -0.191209000 | -2.877214000 |
| 6  | -0.995288000 | -0.020657000 | 4.186283000  |
| 6  | 4.166815000  | 0.209156000  | -0.362038000 |
| 6  | 0.351433000  | -0.232052000 | 4.272377000  |
| 6  | 4.091465000  | -0.109711000 | 0.968007000  |
| 6  | -4.264245000 | -0.256389000 | 0.427620000  |
| 6  | 0.884198000  | 0.305659000  | -4.115416000 |
| 6  | -4.159183000 | -0.483102000 | -0.920166000 |
| 6  | -0.435139000 | -0.034505000 | -4.219236000 |
| 1  | -1.717385000 | 0.047634000  | 4.986598000  |
| 1  | 5.049509000  | 0.381569000  | -0.960117000 |
| 1  | 0.956743000  | -0.356049000 | 5.158220000  |
| 1  | 4.899619000  | -0.236872000 | 1.673163000  |
| 1  | -5.158212000 | -0.226406000 | 1.033125000  |
| 1  | 1.593027000  | 0.496334000  | -4.907757000 |
| 1  | -4.951434000 | -0.662838000 | -1.632036000 |
| 1  | -1.026919000 | -0.164780000 | -5.113347000 |
| 6  | -2.615762000 | 0.082490000  | 2.278351000  |
| 6  | 2.488715000  | 0.468432000  | -2.196259000 |
| 6  | -2.265735000 | -0.440755000 | -2.552217000 |
| 6  | 2.207559000  | -0.362864000 | 2.591050000  |
| 1  | -3.434342000 | 0.150968000  | 2.985125000  |
| 1  | 3.293905000  | 0.673696000  | -2.891730000 |
| 1  | -2.966227000 | -0.604040000 | -3.362496000 |
| 1  | 2.922265000  | -0.498432000 | 3.393902000  |
| 8  | -0.147304000 | 2.144939000  | 0.011506000  |
| 6  | -1.052684000 | 2.902284000  | -0.957398000 |
| 1  | -1.699740000 | 2.212522000  | -1.492593000 |
| 6  | -1.261647000 | 3.047187000  | 0.509822000  |
| 1  | -2.065300000 | 2.476828000  | 0.968519000  |
| 6  | -0.776564000 | 4.273607000  | 1.240916000  |
| 1  | -1.643390000 | 4.938322000  | 1.374007000  |
| 1  | -0.431601000 | 3.984833000  | 2.241823000  |
| 6  | -0.114663000 | 5.275916000  | -0.989353000 |
| 1  | 0.626873000  | 5.887550000  | -1.514731000 |
| 1  | -1.052900000 | 5.848937000  | -0.973614000 |
| 6  | 0.330829000  | 5.014111000  | 0.462560000  |
| 1  | 0.555622000  | 5.960228000  | 0.966609000  |
| 1  | 1.244828000  | 4.406919000  | 0.468295000  |
| 6  | -0.334699000 | 3.958953000  | -1.769651000 |
| 1  | 0.630505000  | 3.536335000  | -2.080824000 |

|   |              |             |              |
|---|--------------|-------------|--------------|
| 1 | -0.909784000 | 4.150499000 | -2.683851000 |
|---|--------------|-------------|--------------|

<sup>4</sup>P<sub>6</sub>:-

|    |              |              |              |
|----|--------------|--------------|--------------|
| 26 | -0.124772000 | 0.120058000  | -0.025232000 |
| 7  | -0.236421000 | -0.029069000 | 1.961605000  |
| 7  | 1.866203000  | 0.123653000  | 0.100083000  |
| 7  | -2.081957000 | -0.293613000 | -0.144871000 |
| 7  | 0.016777000  | -0.083310000 | -2.006839000 |
| 6  | -1.389173000 | -0.172910000 | 2.742255000  |
| 6  | 2.781624000  | 0.175718000  | -0.954571000 |
| 6  | 0.814031000  | 0.091582000  | 2.877877000  |
| 6  | 2.638641000  | 0.221163000  | 1.260774000  |
| 6  | -2.990658000 | -0.420344000 | 0.913384000  |
| 6  | 1.176751000  | -0.003215000 | -2.785726000 |
| 6  | -2.851150000 | -0.437075000 | -1.306341000 |
| 6  | -1.029765000 | -0.239416000 | -2.923545000 |
| 6  | -1.048905000 | -0.129225000 | 4.139191000  |
| 6  | 4.121799000  | 0.294720000  | -0.442722000 |
| 6  | 0.306695000  | 0.034938000  | 4.222522000  |
| 6  | 4.033615000  | 0.323650000  | 0.920996000  |
| 6  | -4.317378000 | -0.638611000 | 0.402668000  |
| 6  | 0.843095000  | -0.096760000 | -4.181553000 |
| 6  | -4.231691000 | -0.647920000 | -0.962751000 |
| 6  | -0.514586000 | -0.241638000 | -4.266552000 |
| 1  | -1.761241000 | -0.224170000 | 4.945206000  |
| 1  | 5.008325000  | 0.346527000  | -1.056917000 |
| 1  | 0.918368000  | 0.100358000  | 5.109961000  |
| 1  | 4.833827000  | 0.403431000  | 1.641519000  |
| 1  | -5.194540000 | -0.774873000 | 1.017560000  |
| 1  | 1.563366000  | -0.066178000 | -4.985473000 |
| 1  | -5.025079000 | -0.793416000 | -1.680706000 |
| 1  | -1.120230000 | -0.353089000 | -5.153598000 |
| 6  | -2.671742000 | -0.349702000 | 2.257070000  |
| 6  | 2.463790000  | 0.124510000  | -2.298309000 |
| 6  | -2.365304000 | -0.394419000 | -2.600341000 |
| 6  | 2.151740000  | 0.217699000  | 2.553754000  |
| 1  | -3.475446000 | -0.459640000 | 2.975642000  |
| 1  | 3.275589000  | 0.172655000  | -3.014426000 |
| 1  | -3.072610000 | -0.516869000 | -3.412202000 |
| 1  | 2.865006000  | 0.300236000  | 3.365268000  |
| 8  | -0.297473000 | 2.207405000  | -0.049949000 |
| 6  | -1.100243000 | 3.156628000  | -0.934245000 |
| 1  | -1.794517000 | 2.614166000  | -1.569391000 |
| 6  | -1.343708000 | 3.155010000  | 0.529448000  |
| 1  | -2.206914000 | 2.612708000  | 0.903704000  |
| 6  | -0.782273000 | 4.236912000  | 1.413604000  |
| 1  | -1.632263000 | 4.817877000  | 1.806217000  |
| 1  | -0.313115000 | 3.772409000  | 2.292508000  |
| 6  | 0.410155000  | 5.157851000  | -0.606522000 |
| 1  | 1.118830000  | 5.861072000  | -1.034877000 |
| 6  | 0.190766000  | 5.155956000  | 0.714019000  |
| 1  | 0.722394000  | 5.857689000  | 1.350529000  |
| 6  | -0.283770000 | 4.241429000  | -1.586113000 |
| 1  | 0.444726000  | 3.779649000  | -2.267524000 |
| 1  | -0.961755000 | 4.823905000  | -2.230468000 |

<sup>4</sup>P<sub>7</sub>:-

|    |              |              |              |
|----|--------------|--------------|--------------|
| 26 | 0.701657000  | -0.156985000 | -0.432521000 |
| 7  | 0.878918000  | -1.435616000 | 1.072526000  |
| 7  | 0.052221000  | -1.633920000 | -1.592092000 |
| 7  | 0.977771000  | 1.350938000  | 0.838736000  |
| 7  | 0.220611000  | 1.155173000  | -1.849027000 |
| 6  | 1.125505000  | -1.148316000 | 2.417266000  |
| 6  | -0.447297000 | -1.539497000 | -2.892255000 |
| 6  | 0.877874000  | -2.830360000 | 0.988517000  |
| 6  | 0.144070000  | -3.001684000 | -1.331133000 |
| 6  | 1.175020000  | 1.279727000  | 2.219252000  |
| 6  | -0.290360000 | 0.885500000  | -3.120366000 |
| 6  | 1.091398000  | 2.708475000  | 0.520314000  |
| 6  | 0.447939000  | 2.533757000  | -1.827899000 |
| 6  | 1.285391000  | -2.367177000 | 3.161885000  |

|   |              |              |              |   |              |             |              |
|---|--------------|--------------|--------------|---|--------------|-------------|--------------|
| 6 | -0.688996000 | -2.853910000 | -3.426401000 | 6 | -2.769048000 | 1.395127000 | 2.001054000  |
| 6 | 1.150891000  | -3.403622000 | 2.278994000  | 6 | 2.958326000  | 2.273535000 | -1.712969000 |
| 6 | -0.309827000 | -3.755426000 | -2.469925000 | 6 | -1.802930000 | 2.133375000 | -2.709764000 |
| 6 | 1.406109000  | 2.592129000  | 2.754809000  | 6 | 1.997611000  | 1.368887000 | 2.967518000  |
| 6 | -0.381753000 | 2.099903000  | -3.884646000 | 1 | -3.669633000 | 1.247343000 | 2.585339000  |
| 6 | 1.376555000  | 3.471212000  | 1.705423000  | 1 | 3.860148000  | 2.405430000 | -2.299117000 |
| 6 | 0.088465000  | 3.113723000  | -3.093714000 | 1 | -2.398068000 | 2.201468000 | -3.612856000 |
| 1 | 1.480056000  | -2.409044000 | 4.223230000  | 1 | 2.597591000  | 1.208771000 | 3.855520000  |
| 1 | -1.086379000 | -3.047074000 | -4.412006000 | 8 | 0.043895000  | 4.075898000 | 0.634601000  |
| 1 | 1.202203000  | -4.464651000 | 2.475059000  | 6 | -0.410363000 | 5.654772000 | -1.355680000 |
| 1 | -0.340223000 | -4.834228000 | -2.513670000 | 6 | 0.006321000  | 5.486503000 | 0.075602000  |
| 1 | 1.576617000  | 2.800780000  | 3.800715000  | 6 | -0.954378000 | 5.123321000 | 1.153020000  |
| 1 | -0.755631000 | 2.156291000  | -4.896427000 | 1 | -1.964607000 | 4.890338000 | 0.825984000  |
| 1 | 1.506077000  | 4.543573000  | 1.723297000  | 1 | 0.895374000  | 6.031197000 | 0.384217000  |
| 1 | 0.168930000  | 4.165259000  | -3.327504000 | 1 | 0.390553000  | 5.350206000 | -2.036299000 |
| 6 | 1.230862000  | 0.115663000  | 2.960217000  | 1 | -0.628209000 | 6.712709000 | -1.545935000 |
| 6 | -0.625676000 | -0.366830000 | -3.600245000 | 1 | -1.305718000 | 5.070868000 | -1.585694000 |
| 6 | 0.889389000  | 3.255442000  | -0.733799000 | 6 | -0.820691000 | 5.533029000 | 2.567878000  |
| 6 | 0.567449000  | -3.563440000 | -0.141339000 | 6 | -1.986795000 | 5.818188000 | 3.299613000  |
| 1 | 1.417291000  | 0.198777000  | 4.023455000  | 6 | -1.900660000 | 6.257450000 | 4.624008000  |
| 1 | -1.018367000 | -0.436143000 | -4.607794000 | 6 | -0.649030000 | 6.399758000 | 5.233196000  |
| 1 | 1.015038000  | 4.325785000  | -0.848211000 | 6 | 0.516952000  | 6.100982000 | 4.514682000  |
| 1 | 0.596476000  | -4.644350000 | -0.070872000 | 6 | 0.434536000  | 5.672189000 | 3.188574000  |
| 8 | 2.630385000  | -0.282806000 | -1.166278000 | 1 | 1.339688000  | 5.425689000 | 2.643097000  |
| 6 | 3.585470000  | 0.855902000  | -1.373920000 | 1 | 1.487349000  | 6.205165000 | 4.988167000  |
| 1 | 3.273659000  | 1.764298000  | -0.867775000 | 1 | -0.580967000 | 6.739297000 | 6.261138000  |
| 1 | 3.898190000  | 0.968814000  | -2.406712000 | 1 | -2.805233000 | 6.485468000 | 5.177238000  |
| 6 | 4.074333000  | -0.286802000 | -0.570397000 | 1 | -2.959748000 | 5.706919000 | 2.829204000  |
| 1 | 4.635530000  | -1.053789000 | -1.096261000 |   |              |             |              |
| 6 | 4.243078000  | -0.260167000 | 0.895630000  |   |              |             |              |
| 6 | 4.297581000  | 0.945168000  | 1.615205000  |   |              |             |              |
| 6 | 4.524144000  | 0.928988000  | 2.994346000  |   |              |             |              |
| 6 | 4.685490000  | -0.289845000 | 3.665743000  |   |              |             |              |
| 6 | 4.620084000  | -1.497009000 | 2.954908000  |   |              |             |              |
| 6 | 4.408236000  | -1.481582000 | 1.574995000  |   |              |             |              |
| 1 | 4.171394000  | 1.892945000  | 1.104049000  |   |              |             |              |
| 1 | 4.577007000  | 1.864228000  | 3.541040000  |   |              |             |              |
| 1 | 4.871172000  | -0.299655000 | 4.734809000  |   |              |             |              |
| 1 | 4.744741000  | -2.441835000 | 3.472278000  |   |              |             |              |
| 1 | 4.367277000  | -2.412762000 | 1.017955000  |   |              |             |              |

<sup>4</sup>P<sub>g</sub>:

|    |              |             |              |
|----|--------------|-------------|--------------|
| 26 | 0.087886000  | 2.028359000 | 0.178293000  |
| 7  | -0.298982000 | 1.484909000 | 2.059669000  |
| 7  | 2.043262000  | 1.834077000 | 0.540101000  |
| 7  | -1.853899000 | 1.810823000 | -0.258409000 |
| 7  | 0.487581000  | 2.169031000 | -1.774842000 |
| 6  | -1.553831000 | 1.327219000 | 2.655785000  |
| 6  | 3.094675000  | 2.032206000 | -0.359104000 |
| 6  | 0.623207000  | 1.307699000 | 3.095590000  |
| 6  | 2.655428000  | 1.610406000 | 1.776504000  |
| 6  | -2.905690000 | 1.602642000 | 0.641178000  |
| 6  | 1.744443000  | 2.319681000 | -2.372382000 |
| 6  | -2.463284000 | 1.929411000 | -1.512720000 |
| 6  | -0.429855000 | 2.239384000 | -2.829823000 |
| 6  | -1.404510000 | 1.055954000 | 4.060951000  |
| 6  | 4.357411000  | 1.929327000 | 0.323945000  |
| 6  | -0.064328000 | 1.041078000 | 4.330994000  |
| 6  | 4.086835000  | 1.666656000 | 1.638202000  |
| 6  | -4.163039000 | 1.604900000 | -0.058066000 |
| 6  | 1.599334000  | 2.496950000 | -3.792315000 |
| 6  | -3.890495000 | 1.802300000 | -1.383903000 |
| 6  | 0.261588000  | 2.442711000 | -4.074260000 |
| 1  | -2.225854000 | 0.890428000 | 4.742049000  |
| 1  | 5.320524000  | 2.036844000 | -0.152353000 |
| 1  | 0.425366000  | 0.862326000 | 5.276563000  |
| 1  | 4.785412000  | 1.517798000 | 2.448017000  |
| 1  | -5.124094000 | 1.458329000 | 0.412067000  |
| 1  | 2.422204000  | 2.629127000 | -4.478959000 |
| 1  | -4.585410000 | 1.850152000 | -2.209086000 |
| 1  | -0.222121000 | 2.523970000 | -5.036288000 |
